# Supplementary material
Source: MDPI journal article supplement (https://www.mdpi.com/2073-4433/14/12/1745)
Supplement: s1 [file s1]

## Tables

Table S1: Distribution of elements in the earth's crust (used as background) [1-2]

| <b>Elements</b> | <b>Background in the earth's crust<br/>(mg/kg)</b> | <b>Elements</b> | <b>Background in the earth's crust<br/>(mg/kg)</b> |
|-----------------|----------------------------------------------------|-----------------|----------------------------------------------------|
| <b>Fe</b>       | 4.720                                              | <b>Cr</b>       | 0.07803                                            |
| <b>Al</b>       | 0.823                                              | <b>Cd</b>       | 0.000351                                           |
| <b>Mn</b>       | 0.597                                              | <b>Ni</b>       | 0.068                                              |
| <b>Zn</b>       | 0.0776                                             | <b>Pb</b>       | 0.0239                                             |
| <b>Cu</b>       | 0.0508                                             | <b>As</b>       | 0.00583                                            |

Table S2: Indexes values

| Index                         | Values             | Class | Quality                                       | Index                   | Values             | Class | Quality                              |
|-------------------------------|--------------------|-------|-----------------------------------------------|-------------------------|--------------------|-------|--------------------------------------|
| <b>I<sub>geo</sub></b><br>[3] | $I_{geo} < 0$      | 0     | practically unpolluted                        | <b>mCd</b><br>[5]       | $mCd < 1.5$        | 0     | Nil to very low contamination        |
|                               | $0 < I_{geo} < 1$  | 1     | unpolluted to moderated polluted              |                         | $1.5 \leq mCd < 2$ | 1     | Low contamination                    |
|                               | $1 < I_{geo} < 2$  | 2     | moderately polluted                           |                         | $2 \leq mCd < 4$   | 2     | Moderate contamination               |
|                               | $2 < I_{geo} < 3$  | 3     | moderately to strongly polluted               |                         | $4 \leq mCd < 8$   | 3     | High contamination                   |
|                               | $3 < I_{geo} < 4$  | 4     | strongly polluted                             |                         | $8 \leq mCd < 16$  | 4     | Very high contamination              |
|                               | $4 < I_{geo} < 5$  | 5     | strongly to extremely polluted                |                         | $16 \leq mCd < 32$ | 5     | Extremely high contamination         |
|                               | $I_{geo} > 5$      | 6     | extremely polluted                            |                         | $mCd \geq 32$      | 6     | Ultra high contamination             |
| <b>CF</b><br>[1-2, 4-5]       | $CF < 1$           | 1     | Low contamination                             | <b>CD</b><br>[1-2, 4-5] | $CD < 8$           | 1     | Low degree of contamination          |
|                               | $1 \leq CF < 3$    | 2     | Moderate contamination                        |                         | $8 \leq CD < 16$   | 2     | Moderate degree of contamination     |
|                               | $3 \leq CF \leq 6$ | 3     | Considerable contamination                    |                         | $16 \leq CD < 32$  | 3     | Considerable degree of contamination |
|                               | $CF > 6$           | 4     | High contamination                            |                         | $CD > 32$          | 4     | Very high degree of contamination    |
| <b>PLI</b><br>[6-8]           | $PLI = 0$          | 0     | Background concentration                      |                         |                    |       |                                      |
|                               | $PLI < 1$          | 1     | Perfection – unpolluted                       |                         |                    |       |                                      |
|                               | $PLI = 1$          | 2     | Base line pollution                           |                         |                    |       |                                      |
|                               | $PLI > 1$          | 3     | Deterioration of site quality Highly polluted |                         |                    |       |                                      |

Table S3: Exposure Parameters used for calculation.

| Factor                        | Definition                                            | Value                                                                            |          |        | Unit                      | Reference         |
|-------------------------------|-------------------------------------------------------|----------------------------------------------------------------------------------|----------|--------|---------------------------|-------------------|
|                               |                                                       | Adults                                                                           | Children | Infant |                           |                   |
| C                             | Heavy metals concentrations                           | Measured                                                                         |          |        | mg/kg                     | The current study |
| D Ingestion                   | The ingestion daily exposure dose                     | Calculated                                                                       |          |        | mg/kg. day                |                   |
| D Inhalation                  | The inhalation daily exposure dose                    |                                                                                  |          |        |                           |                   |
| D Dermal contact              | The dermal daily exposure dose                        |                                                                                  |          |        |                           |                   |
| ADD                           | The average daily dose                                |                                                                                  |          |        |                           |                   |
| BW                            | Average body weight                                   | 70                                                                               | 30       | 10     | kg                        | [9]               |
| IngR                          | Ingestion rate                                        | 100                                                                              | 200      | 200    | mg/day                    | [10]              |
| InhR                          | Inhalation rate                                       | 20                                                                               | 7.6      | 7.6    | m <sup>3</sup> /day       |                   |
| PEF                           | Particle emission factor                              | 1.36×10 <sup>9</sup>                                                             |          |        | m <sup>3</sup> /kg        |                   |
| SA                            | Surface areas of the skin that exposed dust particles | 4656                                                                             | 2625     | 1050   | cm <sup>-2</sup>          |                   |
| TS                            | Total soil or dust adhered                            | 326                                                                              | 525      | 210    | mg/ cm <sup>-2</sup>      |                   |
| EF                            | Exposure frequency                                    | 365                                                                              | 365      | 365    | Days/year                 | [9]               |
| ED                            | Exposure duration                                     | 70                                                                               | 6        | 1      | Years                     |                   |
| AT                            | Averaging time                                        | ED×365                                                                           |          |        | Days                      |                   |
| AF                            | Dermal absorption factor                              | 0.001                                                                            |          |        | Unitless                  | [10]              |
| CF                            | Conversion factor                                     | 1×10 <sup>-6</sup>                                                               |          |        | Kg/mg                     |                   |
| F <sub>IR</sub>               | The fish ingestion rate                               | 0.108                                                                            | 0.027    | 0.013  | kg/day                    | [11-12]           |
| RfD <sub>Inhalation</sub>     | Inhalation reference dose                             | 0.040 (Cu); 0.00035 (Pb); 0.0000143 (Cr); 0.021 (Ni); 0.300 (Zn); 0.0010 (Cd)    |          |        | mg/kg/day                 | [13-18]           |
| RfD <sub>Dermal contact</sub> | Dermal contact reference dose                         | 0.012 (Cu); 0.00053 (Pb); 0.00022 (Cr); 0.0054 (Ni); 0.06 (Zn); 0.00001 (Cd)     |          |        | mg/kg/day                 |                   |
| RfD <sub>Ingestion</sub>      | Ingestion reference dose                              | 0.0000143 (Cu); 0.00000571 (Pb); 0.0206 (Cr); 0.3 (Ni); 0.001 (Zn); 0.00143 (Cd) |          |        | mg/kg/day                 |                   |
| CSF <sub>Inhalation</sub>     | Inhalation Cancer Slope Factors                       | 6.3 (Cd); 0.042 (Pb); 0.41 (Cr); 9.8 (Ni)                                        |          |        | (mg/kg/day) <sup>-1</sup> | [18-20]           |
| CSF <sub>Dermal contact</sub> | Dermal Cancer Slope Factors                           | 6.3 (Cd); 0.0085 (Pb); 0.50 (Cr); 0.84 (Ni)                                      |          |        |                           |                   |
| CSF <sub>Ingestion</sub>      | Ingestion Cancer Slope Factors                        | 6.3 (Cd); 0.0085 (Pb); 0.50 (Cr); 0.84 (Ni)                                      |          |        |                           |                   |

Table S4: A comparison of the concentration levels of heavy metals recorded in Al-Akrasha region with other results in Egypt and other regions around the world

| Country          |                                             | Heavy metals (mg/m <sup>3</sup> ) |       |       |       |       |       |       |       |       |       |      | Ref.  |                   |
|------------------|---------------------------------------------|-----------------------------------|-------|-------|-------|-------|-------|-------|-------|-------|-------|------|-------|-------------------|
|                  |                                             | Cu                                | Pb    | Mn    | Cr    | Ni    | Zn    | Cd    | Al    | Ag    | B     | Fe   |       | As                |
| PM <sub>10</sub> |                                             |                                   |       |       |       |       |       |       |       |       |       |      |       |                   |
| Egypt            | Al-Akrasha, Egypt                           | 0.260                             | 0.676 | 0.837 | 0.162 | 0.068 | 0.060 | 0.011 | 0.428 | 0.104 | 0.156 | 3.54 | 0.008 | The current study |
|                  | Al-Akrasha, Egypt                           | 0.087                             | 0.034 | 0.381 | 0.193 | 0.036 | 1.458 | 0.010 | -     | -     | -     | 4.18 | -     | [5]               |
|                  | Awadallah Smelter – Shoubra El-keima, Egypt | -                                 | 4.126 | -     | 0.150 | -     | 1.309 | 0.037 | -     | -     | -     | -    | 0.039 | [21]              |
|                  | Shoubra El-keima, Egypt                     | 0.060                             | 0.040 | -     | -     | 0.100 | 0.030 | -     | 0.390 | -     | -     | 5.60 | -     | [22]              |
|                  | Giza, Egypt                                 | 0.159                             | 0.035 | -     | -     | 0.013 | -     | 0.007 | -     | -     | -     | -    | 0.021 | [23]              |
|                  | Helwan, Egypt                               | 0.213                             | 0.054 | -     | -     | 0.016 | -     | 0.006 | -     | -     | -     | -    | 0.013 | [23]              |
|                  | Helwan, Egypt                               | 0.057                             | -     | -     | -     | 0.080 | -     | -     | -     | -     | -     | -    | -     | [24]              |
|                  | Helwan, Egypt                               | 0.090                             | 0.050 | -     | -     | 0.070 | 0.040 | -     | 0.250 | -     | -     | 3.60 | -     | [22]              |
|                  | Tebbin, Eyp                                 | 0.156                             | -     | 0.936 | 0.127 | -     | 0.245 | 0.002 | -     | 0.080 | -     | 3.20 | 0.003 | [25]              |
| Africa           | Algris, Algeria                             | 0.102                             | 0.029 | -     | -     | 0.042 | -     | 0.021 | -     | -     | -     | -    | -     | [26]              |
|                  | Nigeria                                     | 0.200                             | 0.400 | 2.400 | -     | 0.030 | 0.200 | 0.020 | -     | -     | -     | 4.00 | -     | [27]              |
|                  | Northern Nigeria                            | 0.086                             | 0.060 | 0.144 | 0.045 | 0.058 | 4.967 | 0.009 | -     | -     | -     | -    | -     | [28]              |
|                  | South Africa                                | 0.200                             | 0.500 | -     | 0.354 | 0.067 | -     | 0.026 | -     | -     | -     | 4.30 | 0.035 | [29]              |
| Asia             | Erbid, Jordan                               | 0.117                             | 0.111 | -     | -     | 0.080 | -     | -     | -     | -     | -     | -    | -     | [30]              |
|                  | Tehran, Iran                                | -                                 | 0.132 | -     | 0.091 | -     | -     | 0.068 | -     | -     | -     | -    | -     | [31]              |
|                  | Isfahan, Iran                               | -                                 | 0.117 | -     | 0.123 | 0.013 | 0.034 | 0.044 | -     | -     | -     | -    | -     | [32]              |
|                  | Ahvaz, Iran                                 | -                                 | 0.453 | -     | 0.100 | 0.139 | 0.058 | 0.034 | 0.160 | -     | -     | -    | -     | [33]              |
|                  | Ahvaz, Iran                                 | 0.028                             | 0.162 | -     | 0.212 | 0.086 | 0.072 | 0.019 | -     | -     | -     | 3.55 | 0.018 | [34]              |
|                  | China                                       | 0.107                             | 0.284 | 0.191 | 0.028 | 0.020 | 0.422 | 0.012 | -     | -     | -     | -    | 0.046 | [35]              |
|                  | Beijing, China                              | 0.060                             | 0.195 | 0.750 | 0.045 | 0.020 | 0.295 | 0.050 | -     | -     | -     | -    | 0.015 |                   |
|                  | Guangzhou, China                            | 0.173                             | 0.417 | 0.134 | 0.053 | -     | 1.220 | 0.010 | -     | -     | -     | -    | 0.039 |                   |
|                  | Wuhan, China                                | 0.036                             | 0.415 | 0.155 | 0.014 | 0.065 | 0.604 | 0.090 | -     | -     | -     | -    | 0.046 |                   |
|                  | Shanghai, China                             | 0.035                             | 0.108 | 0.060 | 0.027 | 0.010 | 0.418 | 0.029 | -     | -     | -     | -    | 0.030 | [36]              |
|                  | Hangzhou, China                             | 0.130                             | 0.370 | 0.130 | 0.020 | 0.020 | 0.550 | 0.010 | -     | -     | -     | -    | 0.120 |                   |
|                  | Hongkong, China                             | 0.021                             | 0.076 | 0.013 | 0.037 | 0.059 | 0.030 | -     | -     | -     | -     | -    | 0.039 |                   |
|                  | Shaoguan, China                             | 0.360                             | 0.960 | 0.200 | 0.430 | 0.040 | 0.790 | -     | -     | -     | -     | -    | 0.010 |                   |
|                  | Chongqing, China                            | -                                 | 0.108 | -     | -     | 0.010 | 0.024 | -     | -     | -     | -     | -    | -     | [37]              |
|                  | Guangzhou, China                            | -                                 | 0.466 | -     | 0.069 | 0.052 | 0.016 | 0.019 | -     | -     | -     | -    | -     | [38]              |
|                  | Ho Chi Minh, Vietnam                        | -                                 | 0.073 | -     | 0.070 | -     | 0.032 | -     | -     | -     | -     | -    | -     | [39]              |
|                  | Taichung, Taiwan                            | -                                 | 0.090 | -     | 0.090 | 0.043 | 0.040 | 0.038 | -     | -     | -     | -    | -     | [40]              |
|                  | Western coastal, Taiwan                     | 0.015                             | 0.021 | -     | -     | 0.098 | -     | 0.070 | -     | -     | -     | -    | 0.033 | [41]              |
|                  | Phitsanulok, Thailand                       | 0.060                             | -     | -     | -     | -     | 0.090 | 0.050 | -     | -     | -     | 5.80 | -     | [42]              |
|                  | Islamabad, Pakistan                         | 0.170                             | 0.035 | -     | -     | 0.010 | -     | 0.010 | -     | -     | -     | -    | -     | [43]              |

| Country               |                                             | Heavy metals (mg/m <sup>3</sup> ) |        |        |        |        |       |        |       |    |       |       | Ref.   |                   |
|-----------------------|---------------------------------------------|-----------------------------------|--------|--------|--------|--------|-------|--------|-------|----|-------|-------|--------|-------------------|
|                       |                                             | Cu                                | Pb     | Mn     | Cr     | Ni     | Zn    | Cd     | Al    | Ag | B     | Fe    |        | As                |
| Europe                | Munich, Germany                             | -                                 | -      | -      | 0.105  | -      | -     | -      | -     | -  | -     | -     | -      | [25]              |
|                       | London, UK                                  | -                                 | -      | -      | 0.112  | -      | -     | -      | -     | -  | -     | 2.30  | -      |                   |
|                       | Athens, Greece                              | 0.191                             | -      | 0.113  | -      | -      | -     | 0.009  | -     | -  | -     | -     | -      | [44]              |
|                       | Italy                                       | 0.012                             | -      | -      | -      | -      | 0.023 | 0.060  | -     | -  | -     | 2.29  | -      | [45]              |
|                       | Acerra, Italy                               | 0.024                             | 0.060  | 0.050  | 0.019  | 0.017  | 0.079 | 0.047  | 0.118 |    |       | 1.395 | 0.027  | [46]              |
|                       | Kayseri, Turkey                             | 0.025                             | 0.032  | 0.027  | 0.011  | 0.070  | 0.129 | 0.010  | 0.771 |    | 0.140 | 1.107 | 0.003  | [47]              |
|                       | Rome, Italy                                 |                                   | 0.092  |        |        | 0.045  |       | 0.052  | -     | -  | -     | -     | 0.013  | [48]              |
|                       | Cuenca, Spain                               | 0.106                             |        |        |        |        | 0.199 | 0.031  | -     | -  | -     | -     | -      | [49]              |
| America               | New York, USA                               | -                                 | -      | -      | 0.062  | -      | -     | -      | -     | -  | -     | 3.20  | -      | [25]              |
|                       | León, Mexico                                | 0.270                             | -      | 0.270  | -      | -      | 1.16  | 0.098  | -     | -  | -     | 3.08  | -      | [50]              |
|                       | Leon, Mexico                                | 0.119                             | -      |        | -      | -      | 0.655 | 0.028  | -     | -  | -     | 1.51  | -      | [51]              |
|                       | Tampico, Mexico                             | 0.090                             | -      | 0.363  | -      | -      | 0.431 | 0.210  | -     | -  | -     | 1.63  | -      | [52]              |
|                       | Tampico, Mexico                             | 0.033                             | -      |        | -      | -      | 0.040 |        | -     | -  | -     | 2.36  | -      | [53]              |
|                       | Tijuana, Mexico                             |                                   | -      | 0.0081 | -      | -      | 0.018 | 0.013  | -     | -  | -     | 0.40  | -      | [54]              |
|                       | Puebla, Mexico                              | 0.090                             | -      |        | -      | -      |       | 0.005  | -     | -  | -     | 1.23  | -      | [55]              |
|                       | Puebla, Mexico                              | 0.461                             | -      | 0.089  | -      | -      |       | 0.019  | -     | -  | -     | 5.85  | -      | [55]              |
|                       | Colima, Mexico                              | 0.398                             | -      | 0.373  | -      | -      | 0.106 | 0.009  | -     | -  | -     | 1.60  | -      | [56]              |
|                       | Sonora, Mexico                              | 0.208                             | -      | -      | -      | -      |       |        | -     | -  | -     | 6.27  | -      | [57]              |
|                       | CDMX, Mexico                                | 0.123                             | -      | -      | -      | -      |       | 0.015  | -     | -  | -     | -     | -      | [58]              |
|                       | Cuba                                        | 0.100                             | -      | -      | -      | -      | 0.548 | 0.077  | -     | -  | -     | -     | -      | [59]              |
|                       | Quito, Ecuador                              | 0.097                             | -      | -      | -      | -      | 0.121 | 0.029  | -     | -  | -     | 4.40  | -      | [60]              |
|                       | Rio de Janeiro, Brazil                      | 0.253                             | -      | 0.090  | -      | -      | 0.182 |        | -     | -  | -     | 6.49  | -      | [61]              |
|                       | Riohacha, Colombia                          | 1.569                             | -      | 0.006  | -      | -      | 1.949 |        | -     | -  | -     | 0.47  | -      | [62]              |
| Wollongong, Australia | 0.049                                       | 0.024                             | 0.046  | -      | -      | 0.019  | 0.011 | -      | -     | -  | -     | 0.002 | [63]   |                   |
| Limits                | NAAQS, Egypt                                | -                                 | 0.001  | -      | -      | -      | -     | -      | -     | -  | -     | -     | -      | [64]              |
|                       | NAAQS, India                                | -                                 | 0.0005 | -      | -      | 0.002  | -     | -      | -     | -  | -     | -     | 0.0006 | [36]              |
|                       | NAAQS, Nigeria                              | 0.01                              | 0.0005 | -      | 0.0012 | 0.0024 | -     | 0.0002 |       |    |       | 10    | 0.0006 | [65]              |
|                       | NAAQS, China                                | -                                 | 0.0005 | -      | 0.0025 | -      | -     | 0.0005 | -     | -  | -     | -     | 0.0006 | [36]              |
|                       | FME <sub>env</sub>                          | -                                 | 0.0005 | 0.01   | 0.001  | -      | -     | 0.0003 | -     | -  | -     | -     | -      | [66]              |
|                       | DPR                                         | -                                 | 0.001  | -      | -      | -      | -     |        | -     | -  | -     | -     | -      | [66]              |
|                       | NESREA                                      | -                                 | 0.0014 | -      | -      | 0.002  | -     | 0.0005 | -     | -  | -     | -     | -      | [67]              |
|                       | WHO/EU                                      | 0.01                              | 0.0005 | 0.0015 | 0.0025 | 0.0005 | 0.005 | 0.0005 | -     | -  | -     | -     | 0.0006 | [28]              |
| Surface soil (mg/kg)  |                                             |                                   |        |        |        |        |       |        |       |    |       |       |        |                   |
| Egypt                 | Al-Akrasha, Egypt                           | 0.171                             | 0.451  | -      | 0.029  | 0.024  | 0.022 | 0.010  | -     | -  | -     | -     | -      | The current study |
|                       | Al-Akrasha, Egypt                           | 0.461                             | 0.309  | -      | 0.138  | 0.042  | 0.036 | 0.016  | -     | -  | -     | -     | -      | [5]               |
|                       | Awadallah Smelter – Shoubra El-keima, Egypt | -                                 | 1.172  | -      | -      | -      | 0.404 | 0.012  | -     | -  | -     | -     | -      | [21]              |

| Country          |                     | Heavy metals (mg/m³) |       |    |       |       |       |       |    |    |   |    | Ref. |         |
|------------------|---------------------|----------------------|-------|----|-------|-------|-------|-------|----|----|---|----|------|---------|
|                  |                     | Cu                   | Pb    | Mn | Cr    | Ni    | Zn    | Cd    | Al | Ag | B | Fe |      | As      |
| Around the world | Bono, Ghana         | 0.687                | 0.109 | -  | 0.633 | -     | 0.119 | -     | -  | -  | - | -  | -    | [68]    |
|                  | China               | 0.200                | 0.236 | -  | 0.539 | 0.234 | 0.677 | 0.010 | -  | -  | - | -  | -    | [69]    |
|                  | Western area, China | -                    | 0.300 | -  | -     | -     | 0.025 | 0.030 | -  | -  | - | -  | -    | [70]    |
|                  | Rampal, Bangladesh  | 0.237                | 0.511 | -  | 0.027 | 0.269 | 0.485 | -     | -  | -  | - | -  | -    | [71]    |
|                  | Babol, Iran         | -                    | 0.031 | -  | 0.324 | 0.345 | 0.828 | 0.032 | -  | -  | - | -  | -    | [72]    |
|                  | Ireland             | 0.169                | 0.304 | -  | 0.495 | 0.135 | 0.703 | 0.050 | -  | -  | - | -  | -    | [73]    |
|                  | USA                 | 0.170                | 0.160 | -  | 0.370 | 0.130 | 0.480 | 0.016 | -  | -  | - | -  | -    | [69]    |
|                  | Rondônia, Brazil    | 0.020                | 0.020 | -  | 0.150 | 0.020 | 0.100 | 0.010 | -  | -  | - | -  | -    | [74]    |
|                  | Austrália           | 0.100                | 0.150 | -  | 0.100 | 0.600 | 1.400 | 0.010 | -  | -  | - | -  | -    | [69]    |
| Limits           | EU Standards        | 250                  | 300   | -  | 150   | 75    | 600   | 3     | -  | -  | - | -  | -    | [5]     |
|                  | EPA limits          | 16.5                 | 8.1   | -  | 39.4  | 1.3   | 6.8   | 0.3   | -  | -  | - | -  | -    | [74]    |
|                  | WHO and FAO limits  | 100                  | 100   | -  | 100   | 50    | 300   |       |    |    |   |    |      | [75]    |
|                  | NJDEP limits        | -                    | 600   | -  | 100   | -     | 1500  | 100   | -  | -  | - | -  | -    | [76-77] |
|                  | Indian Standard     | 270                  | 500   | -  | -     | -     | -     | 6     | -  | -  | - | -  | -    | [78]    |
|                  | China standard      | -                    | 23.9  | -  | -     | -     | 79.9  | 0.20  | -  | -  | - | -  | -    | [79]    |

**NAAQS**: National Ambient Air Quality Standards; **EU**: European Union; **WHO**: World Health Organization; **FME****nv**: Federal Ministry of Environment; **DPR**: Department of Petroleum Resources; **NESREA**: Federal Ministry of Environment; **EPA**: Environmental Protection Agency; **FAO**: The Food and Agriculture Organization; and **NJDEP**: New Jersey Department of Environmental Protection.

Table S5: A comparison of the concentration levels of heavy metals recorded in the edible fish of tilapia samples which collected from the Ismailia Canal with other results in Egypt and other areas around the world

| Country                             | C (mg/kg) |       |       | References        | Country                       | C (mg/kg) |       |       | References |
|-------------------------------------|-----------|-------|-------|-------------------|-------------------------------|-----------|-------|-------|------------|
|                                     | Pb        | Cd    | Hg    |                   |                               | Pb        | Cd    | Hg    |            |
| Ismailia Canal in Al-Akrasha, Egypt | 0.227     | 0.035 | 0.107 | The current study | Meghna river, Bangladesh      | 3.66      | -     | -     | [95]       |
| Manzala Lake, Egypt                 | 15.0      | 1.54  | -     | [80]              | rivers in India               | 0.3       | -     | 0.5   | [96]       |
| Manzala Lake, Egypt                 | 2.98      | 1.71  | -     | [81]              | Galas River, Malaysia         | 0.3       | -     | -     | [97]       |
| Manzala Lake, Egypt                 | 36.57     | 0.78  | -     | [82]              | Rivers in China               | 2         | -     | 0.3   | [98]       |
| Hurghada, Red Sea                   | -         | 0.02  | -     | [83]              | Caspian Sea, Gorgan Bay, Iran | 0.43      | -     | -     | [99]       |
| Red Sea                             | -         | 0.26  | -     | [84]              | Lake Rd, Asafo market, Ghana  | 0.085     | -     | -     | [100]      |
| Gulf of Aqaba, Red Sea              | -         | 0.83  | -     | [85]              | Pearl river, China            | 1.94      | -     | -     | [101]      |
| Jeddah coast, Red Sea               | -         | 0.90  | -     | [86]              | Egyptian limit*               | 0.300     | 0.050 | 0.500 | [102-103]  |
| Yemen, Gulf Aden                    | -         | 0.39  | -     | [87]              | EC limits                     | 1         | 0.17  | 1     | [104]      |
| Mediterranean Sea                   | 5.32      | 0.66  | -     | [88]              | FAO limits                    | 2         | 0.17  | 0.5   | [105]      |
| Mediterranean Sea                   | -         | 0.05  | -     | [89]              | WHO limits                    | 0.5       | 3.33  | 0.5   | [106]      |
| Black Sea                           | -         | 0.10  | -     | [90]              | FAO/WHO limits                | -         | 1.67  | 0.5   | [107]      |
| Durban Lake, South Africa           | 0.73      | -     | -     | [91]              | NOAA limits                   | 128       | -     | 0.5   | [108]      |
| Meghna river, Noakhali, Bangladesh  | 0.52      | -     | 1.65  | [92]              | FDA limits                    | 1.7       | -     | 1     | [109]      |
| Bangshi river, Bangladesh           | 4.64      | -     | -     | [93]              | ROPME limits                  | 1.28      | -     | 1     | [110]      |
| Meghna river, Bangladesh            | 0.3       | -     | -     | [94]              | England limits                | -         | 0.67  | -     | [111]      |

EC: European Commission; **FAO**: The Food and Agriculture Organization; **WHO**: World Health Organization; **NOAA**: National Oceanic and Atmospheric Administration; **FDA**: Food and Drug Administration; **ROPME**: Regional Organization for the Protection of the Marine Environment.

Table S5: A comparison of Blood lead level (BLL) recorded in the current study with other results in Egypt and around the world

|        | Site              | blood lead levels (BLLs) $\mu\text{g/dl}$ | References |
|--------|-------------------|-------------------------------------------|------------|
| Egypt  | Al-Akrasha region | Workers in Awadallah Factory              | 22.3       |
|        |                   | Staff worked in health center             | 7.5        |
|        |                   | People living in Al-Akrasha               | 16.2       |
|        | Greater Cairo     | Dokki area                                | 5.4        |
|        |                   | Helwan area                               | 10.3       |
|        |                   | Faysal areas                              | 15.4       |
|        |                   | Shoubra El-Kheima and Helwan              | 8.6        |
|        |                   | rural areas near cultivated lands         | 5.4        |
|        |                   | Urban area                                | 30.5       |
|        |                   | Rural area                                | 12.1       |
|        |                   | Greater Cairo                             | 33.8       |
|        |                   | El-Waily area                             | 55.1       |
|        |                   | Greater Cairo                             | 18.8       |
|        |                   | non-industrial area                       | 8.8        |
|        |                   | residential areas                         | 3.9        |
|        |                   | traffic area                              | 7.4        |
|        |                   | Residential areas                         | 3.9        |
|        |                   | Traffic areas                             | 7.4        |
|        |                   | Industrial areas                          | 2.7        |
|        |                   | Mixed areas                               | 5.1        |
|        | Giza              | Rural                                     | 46.4       |
|        |                   | Urban                                     | 20.5       |
|        | Sharkia           |                                           | 31.6       |
| China  | Suburban          | 60.3                                      |            |
|        | Downtown          | 58.1                                      |            |
|        | Countryside       | 56.7                                      |            |
| Japan  |                   | 2.02                                      |            |
| China  |                   | 3.3                                       |            |
| Sweden |                   | 1.1                                       |            |



Table S7: Exposure dose (D) of heavy metals in PM<sub>10</sub> and surface soil

| D                                        | Sites  | Infant  |         |         |         |         |         | Children |         |         |         |         |         | Adult   |         |         |         |         |         |
|------------------------------------------|--------|---------|---------|---------|---------|---------|---------|----------|---------|---------|---------|---------|---------|---------|---------|---------|---------|---------|---------|
|                                          |        | Cu      | Pb      | Cr      | Ni      | Zn      | Cd      | Cu       | Pb      | Cr      | Ni      | Zn      | Cd      | Cu      | Pb      | Cr      | Ni      | Zn      | Cd      |
| PM <sub>10</sub>                         |        |         |         |         |         |         |         |          |         |         |         |         |         |         |         |         |         |         |         |
| D <sub>Inhalation</sub> (mg/kg. day)     | Site-1 | 1.4E-10 | 3.2E-10 | 1.0E-10 | 4.7E-11 | 2.8E-11 | 6.7E-12 | 4.8E-11  | 1.0E-10 | 3.5E-11 | 1.5E-11 | 9.5E-12 | 2.2E-12 | 5.4E-11 | 1.2E-10 | 3.9E-11 | 1.7E-11 | 1.0E-11 | 2.2E-12 |
|                                          | Site-2 | 2.4E-10 | 2.5E-10 | 1.4E-10 | 5.4E-11 | 3.7E-11 | 9.5E-12 | 8.2E-11  | 8.6E-11 | 4.7E-11 | 1.8E-11 | 1.2E-11 | 3.1E-12 | 9.2E-11 | 9.7E-11 | 5.3E-11 | 2.0E-11 | 1.4E-11 | 3.5E-12 |
|                                          | Site-3 | 1.0E-10 | 2.0E-10 | 7.9E-11 | 2.9E-11 | 2.2E-11 | 5.0E-12 | 3.5E-11  | 6.7E-11 | 2.6E-11 | 9.6E-12 | 7.6E-12 | 1.6E-12 | 3.9E-11 | 7.6E-11 | 2.9E-11 | 1.0E-11 | 8.6E-12 | 1.8E-12 |
|                                          | Site-4 | 1.1E-10 | 1.8E-10 | 5.4E-11 | 3.4E-11 | 1.9E-11 | 5.0E-12 | 3.9E-11  | 6.0E-11 | 1.8E-11 | 1.1E-11 | 6.5E-12 | 1.6E-12 | 4.4E-11 | 6.8E-11 | 2.0E-11 | 1.2E-11 | 7.3E-12 | 1.8E-12 |
|                                          | Site-5 | 1.1E-10 | 2.9E-10 | 8.9E-11 | 2.9E-11 | 2.0E-11 | 4.4E-12 | 3.8E-11  | 9.8E-11 | 2.9E-11 | 9.8E-12 | 6.7E-12 | 1.4E-12 | 4.3E-11 | 1.1E-10 | 3.3E-11 | 1.1E-11 | 7.5E-12 | 1.6E-12 |
|                                          | Site-6 | 2.1E-10 | 9.7E-10 | 2.3E-10 | 3.9E-11 | 5.3E-11 | 1.5E-11 | 6.9E-11  | 3.2E-10 | 7.9E-11 | 1.3E-11 | 1.7E-11 | 5.0E-12 | 7.8E-11 | 3.6E-10 | 8.9E-11 | 1.4E-11 | 2.0E-11 | 5.6E-12 |
|                                          | Site-7 | 1.8E-10 | 3.5E-10 | 1.2E-10 | 1.9E-11 | 2.4E-11 | 3.9E-12 | 6.1E-11  | 1.1E-10 | 4.1E-11 | 6.5E-12 | 8.0E-12 | 1.3E-12 | 6.9E-11 | 1.3E-10 | 4.6E-11 | 7.3E-12 | 9.0E-12 | 1.4E-12 |
|                                          | Site-8 | 1.7E-10 | 5.4E-10 | 8.5E-11 | 3.3E-11 | 3.3E-11 | 3.3E-12 | 5.8E-11  | 1.8E-10 | 2.8E-11 | 1.1E-11 | 1.1E-11 | 1.1E-12 | 6.6E-11 | 2.0E-10 | 3.2E-11 | 1.2E-11 | 1.2E-11 | 1.2E-12 |
|                                          | Site-9 | 1.2E-10 | 2.6E-10 | 9.4E-11 | 2.9E-11 | 2.2E-11 | 2.2E-12 | 4.0E-11  | 8.7E-11 | 3.1E-11 | 9.8E-12 | 7.6E-12 | 7.4E-13 | 4.6E-11 | 9.8E-11 | 3.5E-11 | 1.1E-11 | 8.6E-12 | 8.4E-13 |
| D <sub>Dermal contact</sub> (mg/kg. day) | Site-1 | 5.7E-06 | 1.2E-05 | 4.1E-06 | 1.8E-06 | 1.1E-06 | 2.6E-07 | 1.1E-05  | 2.6E-05 | 8.6E-06 | 3.9E-06 | 2.3E-06 | 5.5E-07 | 5.6E-06 | 1.2E-05 | 4.0E-06 | 1.8E-06 | 1.1E-06 | 2.6E-07 |
|                                          | Site-2 | 9.7E-06 | 1.0E-05 | 5.5E-06 | 2.1E-06 | 1.4E-06 | 3.7E-07 | 2.0E-05  | 2.1E-05 | 1.1E-05 | 4.4E-06 | 3.0E-06 | 7.8E-07 | 9.5E-06 | 1.0E-05 | 5.4E-06 | 2.1E-06 | 1.4E-06 | 3.6E-07 |
|                                          | Site-3 | 4.1E-06 | 8.0E-06 | 3.1E-06 | 1.1E-06 | 9.0E-07 | 1.9E-07 | 8.7E-06  | 1.6E-05 | 6.5E-06 | 2.3E-06 | 1.8E-06 | 4.1E-07 | 4.1E-06 | 7.8E-06 | 3.0E-06 | 1.1E-06 | 8.8E-07 | 1.9E-07 |
|                                          | Site-4 | 4.6E-06 | 7.1E-06 | 2.1E-06 | 1.3E-06 | 7.7E-07 | 1.9E-07 | 9.6E-06  | 1.4E-05 | 4.5E-06 | 2.8E-06 | 1.6E-06 | 4.1E-07 | 4.5E-06 | 7.0E-06 | 2.1E-06 | 1.3E-06 | 7.5E-07 | 1.9E-07 |
|                                          | Site-5 | 4.5E-06 | 1.1E-05 | 3.5E-06 | 1.1E-06 | 7.9E-07 | 1.7E-07 | 9.5E-06  | 2.4E-05 | 7.3E-06 | 2.4E-06 | 1.6E-06 | 3.6E-07 | 4.4E-06 | 1.1E-05 | 3.4E-06 | 1.1E-06 | 7.8E-07 | 1.7E-07 |
|                                          | Site-6 | 8.2E-06 | 3.8E-05 | 9.3E-06 | 1.5E-06 | 2.0E-06 | 5.9E-07 | 1.7E-05  | 7.9E-05 | 1.9E-05 | 3.2E-06 | 4.3E-06 | 1.2E-06 | 8.1E-06 | 3.7E-05 | 9.2E-06 | 1.5E-06 | 2.0E-06 | 5.8E-07 |
|                                          | Site-7 | 7.2E-06 | 1.4E-05 | 4.8E-06 | 7.7E-07 | 9.4E-07 | 1.5E-07 | 1.5E-05  | 2.9E-05 | 1.0E-05 | 1.6E-06 | 1.9E-06 | 3.2E-07 | 7.1E-06 | 1.3E-05 | 4.7E-06 | 7.5E-07 | 9.3E-07 | 1.5E-07 |
|                                          | Site-8 | 6.9E-06 | 2.1E-05 | 3.3E-06 | 1.3E-06 | 1.3E-06 | 1.3E-07 | 1.4E-05  | 4.4E-05 | 7.0E-06 | 2.7E-06 | 2.7E-06 | 2.7E-07 | 6.8E-06 | 2.1E-05 | 3.3E-06 | 1.2E-06 | 1.2E-06 | 1.3E-07 |
|                                          | Site-9 | 4.8E-06 | 1.0E-05 | 3.7E-06 | 1.1E-06 | 9.0E-07 | 8.8E-08 | 1.0E-05  | 2.1E-05 | 7.7E-06 | 2.4E-06 | 1.8E-06 | 1.8E-07 | 4.7E-06 | 1.0E-05 | 3.6E-06 | 1.1E-06 | 8.8E-07 | 8.6E-08 |
| D <sub>Ingestion</sub> (mg/kg. day)      | Site-1 | 3.1E-04 | 7.1E-04 | 2.2E-04 | 1.0E-04 | 6.2E-05 | 1.4E-05 | 5.4E-05  | 1.2E-04 | 3.9E-05 | 1.7E-05 | 1.0E-05 | 2.5E-06 | 9.4E+03 | 2.1E+04 | 6.8E+03 | 3.1E+03 | 1.8E+03 | 4.3E+02 |
|                                          | Site-2 | 5.3E-04 | 5.6E-04 | 3.0E-04 | 1.1E-04 | 8.1E-05 | 2.0E-05 | 9.1E-05  | 9.6E-05 | 5.2E-05 | 2.0E-05 | 1.4E-05 | 3.5E-06 | 1.6E+04 | 1.6E+04 | 9.2E+03 | 3.5E+03 | 2.4E+03 | 6.2E+02 |
|                                          | Site-3 | 2.3E-04 | 4.4E-04 | 1.7E-04 | 6.3E-05 | 4.9E-05 | 1.1E-05 | 3.9E-05  | 7.5E-05 | 2.9E-05 | 1.0E-05 | 8.5E-06 | 1.8E-06 | 6.9E+03 | 1.3E+04 | 5.1E+03 | 1.9E+03 | 1.5E+03 | 3.2E+02 |
|                                          | Site-4 | 2.5E-04 | 3.9E-04 | 1.1E-04 | 7.4E-05 | 4.2E-05 | 1.1E-05 | 4.3E-05  | 6.7E-05 | 2.0E-05 | 1.2E-05 | 7.3E-06 | 1.8E-06 | 7.6E+03 | 1.1E+04 | 3.5E+03 | 2.2E+03 | 1.2E+03 | 3.2E+02 |
|                                          | Site-5 | 2.5E-04 | 6.4E-04 | 1.9E-04 | 6.4E-05 | 4.3E-05 | 9.7E-06 | 4.3E-05  | 1.1E-04 | 3.3E-05 | 1.1E-05 | 7.5E-06 | 1.6E-06 | 7.5E+03 | 1.9E+04 | 5.8E+03 | 1.9E+03 | 1.3E+03 | 2.9E+02 |

| D                                        | Sites  | Infant  |         |         |         |         |         | Children |         |         |         |         |         | Adult   |         |         |         |         |         |
|------------------------------------------|--------|---------|---------|---------|---------|---------|---------|----------|---------|---------|---------|---------|---------|---------|---------|---------|---------|---------|---------|
|                                          |        | Cu      | Pb      | Cr      | Ni      | Zn      | Cd      | Cu       | Pb      | Cr      | Ni      | Zn      | Cd      | Cu      | Pb      | Cr      | Ni      | Zn      | Cd      |
| Average Daily Dose (ADD)<br>(mg/kg, day) | Site-6 | 4.5E-04 | 2.1E-03 | 5.1E-04 | 8.5E-05 | 1.1E-04 | 3.2E-05 | 7.8E-05  | 3.6E-04 | 8.8E-05 | 1.4E-05 | 1.9E-05 | 5.6E-06 | 1.3E+04 | 6.3E+04 | 1.5E+04 | 2.5E+03 | 3.4E+03 | 9.8E+02 |
|                                          | Site-7 | 4.0E-04 | 7.8E-04 | 2.6E-04 | 4.2E-05 | 5.2E-05 | 8.5E-06 | 6.8E-05  | 1.3E-04 | 4.5E-05 | 7.3E-06 | 8.9E-06 | 1.4E-06 | 1.2E+04 | 2.3E+04 | 8.0E+03 | 1.2E+03 | 1.5E+03 | 2.5E+02 |
|                                          | Site-8 | 3.8E-04 | 1.1E-03 | 1.8E-04 | 7.1E-05 | 7.1E-05 | 7.3E-06 | 6.5E-05  | 2.0E-04 | 3.1E-05 | 1.2E-05 | 1.2E-05 | 1.2E-06 | 1.1E+04 | 3.5E+04 | 5.5E+03 | 2.1E+03 | 2.1E+03 | 2.1E+02 |
|                                          | Site-9 | 2.6E-04 | 5.6E-04 | 2.0E-04 | 6.4E-05 | 4.9E-05 | 1.6E-05 | 4.5E-05  | 9.7E-05 | 3.5E-05 | 1.1E-05 | 8.5E-06 | 8.3E-07 | 7.9E+03 | 1.7E+04 | 6.1E+03 | 1.9E+03 | 1.5E+03 | 1.4E+02 |
|                                          | Site-1 | 4.0E-02 | 1.0E-03 | 2.4E-04 | 2.1E-02 | 3.0E-01 | 1.0E-03 | 1.2E-02  | 6.7E-04 | 2.6E-04 | 5.4E-03 | 6.0E-02 | 1.3E-05 | 9.4E+03 | 2.1E+04 | 6.8E+03 | 3.1E+03 | 1.8E+03 | 4.3E+02 |
|                                          | Site-2 | 4.0E-02 | 9.2E-04 | 3.2E-04 | 2.1E-02 | 3.0E-01 | 1.0E-03 | 1.2E-02  | 6.4E-04 | 2.8E-04 | 5.4E-03 | 6.0E-02 | 1.4E-05 | 1.6E+04 | 1.6E+04 | 9.2E+03 | 3.5E+03 | 2.4E+03 | 6.2E+02 |
|                                          | Site-3 | 4.0E-02 | 8.0E-04 | 1.9E-04 | 2.1E-02 | 3.0E-01 | 1.0E-03 | 1.2E-02  | 6.2E-04 | 2.5E-04 | 5.4E-03 | 6.0E-02 | 1.2E-05 | 6.9E+03 | 1.3E+04 | 5.1E+03 | 1.9E+03 | 1.5E+03 | 3.2E+02 |
|                                          | Site-4 | 4.0E-02 | 7.5E-04 | 1.3E-04 | 2.1E-02 | 3.0E-01 | 1.0E-03 | 1.2E-02  | 6.1E-04 | 2.4E-04 | 5.4E-03 | 6.0E-02 | 1.2E-05 | 7.6E+03 | 1.1E+04 | 3.5E+03 | 2.2E+03 | 1.2E+03 | 3.2E+02 |
|                                          | Site-5 | 4.0E-02 | 1.0E-03 | 2.1E-04 | 2.1E-02 | 3.0E-01 | 1.0E-03 | 1.2E-02  | 6.6E-04 | 2.6E-04 | 5.4E-03 | 6.0E-02 | 1.2E-05 | 7.5E+03 | 1.9E+04 | 5.8E+03 | 1.9E+03 | 1.3E+03 | 2.9E+02 |
|                                          | Site-6 | 4.0E-02 | 2.5E-03 | 5.4E-04 | 2.1E-02 | 3.0E-01 | 1.0E-03 | 1.2E-02  | 9.7E-04 | 3.2E-04 | 5.4E-03 | 6.0E-02 | 1.6E-05 | 1.3E+04 | 6.3E+04 | 1.5E+04 | 2.5E+03 | 3.4E+03 | 9.8E+02 |
|                                          | Site-7 | 4.0E-02 | 1.1E-03 | 2.8E-04 | 2.1E-02 | 3.0E-01 | 1.0E-03 | 1.2E-02  | 6.9E-04 | 2.7E-04 | 5.4E-03 | 6.0E-02 | 1.1E-05 | 1.2E+04 | 2.3E+04 | 8.0E+03 | 1.2E+03 | 1.5E+03 | 2.5E+02 |
|                                          | Site-8 | 4.0E-02 | 1.5E-03 | 2.0E-04 | 2.1E-02 | 3.0E-01 | 1.0E-03 | 1.2E-02  | 7.7E-04 | 2.5E-04 | 5.4E-03 | 6.0E-02 | 1.1E-05 | 1.1E+04 | 3.5E+04 | 5.5E+03 | 2.1E+03 | 2.1E+03 | 2.1E+02 |
|                                          | Site-9 | 4.0E-02 | 9.2E-04 | 2.2E-04 | 2.1E-02 | 3.0E-01 | 1.0E-03 | 1.2E-02  | 6.4E-04 | 2.6E-04 | 5.4E-03 | 6.0E-02 | 1.1E-05 | 7.9E+03 | 1.7E+04 | 6.1E+03 | 1.9E+03 | 1.5E+03 | 1.4E+02 |
| Surface soil                             |        |         |         |         |         |         |         |          |         |         |         |         |         |         |         |         |         |         |         |
| D Inhalation (mg/kg, day)                | Site-1 | 5.0E-11 | 3.4E-10 | 1.3E-11 | 9.7E-12 | 7.7E-12 | 6.4E-12 | 1.6E-11  | 1.1E-10 | 4.6E-12 | 3.2E-12 | 2.5E-12 | 2.1E-12 | 1.8E-11 | 1.2E-10 | 5.2E-12 | 3.6E-12 | 2.9E-12 | 2.4E-12 |
|                                          | Site-2 | 9.3E-11 | 2.3E-10 | 1.3E-11 | 1.3E-11 | 1.4E-11 | 3.3E-12 | 3.1E-11  | 7.7E-11 | 4.4E-12 | 4.4E-12 | 4.7E-12 | 1.1E-12 | 3.5E-11 | 8.7E-11 | 5.0E-12 | 4.9E-12 | 5.3E-12 | 1.2E-12 |
|                                          | Site-3 | 8.8E-11 | 3.1E-10 | 1.9E-11 | 1.0E-11 | 1.5E-11 | 5.2E-12 | 2.9E-11  | 1.0E-10 | 6.4E-12 | 3.4E-12 | 5.0E-12 | 1.7E-12 | 3.3E-11 | 1.1E-10 | 7.3E-12 | 3.9E-12 | 5.6E-12 | 1.9E-12 |
|                                          | Site-4 | 1.0E-10 | 2.2E-10 | 2.1E-11 | 1.1E-11 | 1.1E-11 | 2.5E-12 | 3.4E-11  | 7.6E-11 | 7.0E-12 | 3.7E-12 | 3.6E-12 | 8.6E-13 | 3.8E-11 | 8.6E-11 | 7.9E-12 | 4.2E-12 | 4.1E-12 | 9.7E-13 |
|                                          | Site-5 | 8.8E-11 | 1.1E-10 | 1.6E-11 | 1.3E-11 | 9.8E-12 | 2.4E-12 | 2.9E-11  | 3.9E-11 | 5.3E-12 | 4.6E-12 | 3.2E-12 | 8.0E-13 | 3.3E-11 | 4.3E-11 | 6.0E-12 | 5.2E-12 | 3.7E-12 | 9.1E-13 |
|                                          | Site-6 | 1.3E-10 | 4.0E-10 | 1.7E-11 | 1.3E-11 | 6.8E-12 | 5.5E-12 | 4.3E-11  | 1.3E-10 | 5.8E-12 | 4.5E-12 | 2.2E-12 | 1.8E-12 | 4.9E-11 | 1.5E-10 | 6.6E-12 | 5.1E-12 | 2.5E-12 | 2.1E-12 |
|                                          | Site-7 | 9.4E-11 | 1.2E-10 | 2.1E-11 | 1.9E-11 | 1.5E-11 | 8.2E-12 | 3.1E-11  | 4.0E-11 | 7.3E-12 | 6.4E-12 | 5.2E-12 | 2.7E-12 | 3.5E-11 | 4.5E-11 | 8.2E-12 | 7.2E-12 | 5.9E-12 | 3.1E-12 |
|                                          | Site-8 | 8.7E-11 | 1.1E-10 | 1.0E-11 | 1.8E-11 | 1.5E-11 | 8.1E-12 | 2.9E-11  | 3.6E-11 | 3.6E-12 | 6.2E-12 | 5.0E-12 | 2.7E-12 | 3.2E-11 | 4.1E-11 | 4.1E-12 | 7.0E-12 | 5.6E-12 | 3.0E-12 |
|                                          | Site-9 | 1.2E-10 | 3.9E-10 | 1.2E-11 | 1.1E-11 | 1.4E-11 | 7.4E-12 | 4.1E-11  | 1.3E-10 | 4.2E-12 | 3.6E-12 | 4.6E-12 | 2.4E-12 | 4.7E-11 | 1.5E-10 | 4.7E-12 | 4.1E-12 | 5.2E-12 | 2.8E-12 |
| Dermal contact<br>$f_{max}f_{so}$        | Site-1 | 1.9E-06 | 1.3E-05 | 5.4E-07 | 3.8E-07 | 3.0E-07 | 2.5E-07 | 4.1E-06  | 2.8E-05 | 1.1E-06 | 8.0E-07 | 6.3E-07 | 5.2E-07 | 1.9E-06 | 1.3E-05 | 5.3E-07 | 3.7E-07 | 3.0E-07 | 2.4E-07 |
|                                          | Site-2 | 3.6E-06 | 9.1E-06 | 5.2E-07 | 5.2E-07 | 5.5E-07 | 1.3E-07 | 7.6E-06  | 1.9E-05 | 1.0E-06 | 1.0E-06 | 1.1E-06 | 2.7E-07 | 3.6E-06 | 8.9E-06 | 5.1E-07 | 5.1E-07 | 5.4E-07 | 1.3E-07 |

| D                                        | Sites  | Infant  |         |         |         |         |         | Children |         |         |         |         |         | Adult   |         |         |         |         |         |
|------------------------------------------|--------|---------|---------|---------|---------|---------|---------|----------|---------|---------|---------|---------|---------|---------|---------|---------|---------|---------|---------|
|                                          |        | Cu      | Pb      | Cr      | Ni      | Zn      | Cd      | Cu       | Pb      | Cr      | Ni      | Zn      | Cd      | Cu      | Pb      | Cr      | Ni      | Zn      | Cd      |
| D <sub>Ingestion (mg/kg. day)</sub>      | Site-3 | 3.4E-06 | 1.2E-05 | 7.6E-07 | 4.1E-07 | 5.9E-07 | 2.0E-07 | 7.2E-06  | 2.5E-05 | 1.6E-06 | 8.5E-07 | 1.2E-06 | 4.2E-07 | 3.4E-06 | 1.2E-05 | 7.5E-07 | 4.0E-07 | 5.8E-07 | 2.0E-07 |
|                                          | Site-4 | 4.0E-06 | 9.0E-06 | 8.3E-07 | 4.4E-07 | 4.3E-07 | 1.0E-07 | 8.5E-06  | 1.8E-05 | 1.7E-06 | 9.2E-07 | 9.0E-07 | 2.1E-07 | 4.0E-06 | 8.9E-06 | 8.2E-07 | 4.3E-07 | 4.2E-07 | 1.0E-07 |
|                                          | Site-5 | 3.4E-06 | 4.6E-06 | 6.3E-07 | 5.4E-07 | 3.9E-07 | 9.5E-08 | 7.2E-06  | 9.6E-06 | 1.3E-06 | 1.1E-06 | 8.1E-07 | 1.9E-07 | 3.4E-06 | 4.5E-06 | 6.2E-07 | 5.3E-07 | 3.8E-07 | 9.4E-08 |
|                                          | Site-6 | 5.1E-06 | 1.6E-05 | 6.9E-07 | 5.3E-07 | 2.7E-07 | 2.2E-07 | 1.0E-05  | 3.3E-05 | 1.4E-06 | 1.1E-06 | 5.6E-07 | 4.5E-07 | 5.0E-06 | 1.5E-05 | 6.8E-07 | 5.2E-07 | 2.6E-07 | 2.1E-07 |
|                                          | Site-7 | 3.7E-06 | 4.8E-06 | 8.6E-07 | 7.6E-07 | 6.2E-07 | 3.2E-07 | 7.7E-06  | 9.9E-06 | 1.8E-06 | 1.5E-06 | 1.2E-06 | 6.8E-07 | 3.6E-06 | 4.7E-06 | 8.4E-07 | 7.4E-07 | 6.1E-07 | 3.2E-07 |
|                                          | Site-8 | 3.4E-06 | 4.3E-06 | 4.3E-07 | 7.4E-07 | 5.9E-07 | 3.2E-07 | 7.1E-06  | 9.0E-06 | 8.9E-07 | 1.5E-06 | 1.2E-06 | 6.6E-07 | 3.3E-06 | 4.2E-06 | 4.2E-07 | 7.3E-07 | 5.8E-07 | 3.1E-07 |
|                                          | Site-9 | 4.9E-06 | 1.5E-05 | 5.0E-07 | 4.3E-07 | 5.5E-07 | 2.9E-07 | 1.0E-05  | 3.2E-05 | 1.0E-06 | 9.1E-07 | 1.1E-06 | 6.1E-07 | 4.8E-06 | 1.5E-05 | 4.9E-07 | 4.3E-07 | 5.4E-07 | 2.8E-07 |
|                                          | Site-1 | 1.0E-04 | 7.4E-04 | 3.0E-05 | 2.1E-05 | 1.6E-05 | 1.4E-05 | 1.8E-05  | 1.2E-04 | 5.1E-06 | 3.6E-06 | 2.8E-06 | 2.4E-06 | 3.2E+03 | 2.2E+04 | 9.0E+02 | 6.3E+02 | 5.0E+02 | 4.2E+02 |
|                                          | Site-2 | 2.0E-04 | 5.0E-04 | 2.9E-05 | 2.8E-05 | 3.0E-05 | 7.3E-06 | 3.4E-05  | 8.6E-05 | 4.9E-06 | 4.9E-06 | 5.2E-06 | 1.2E-06 | 6.0E+03 | 1.5E+04 | 8.7E+02 | 8.6E+02 | 9.2E+02 | 2.1E+02 |
| Average Daily Dose (ADD)<br>(mg/kg. day) | Site-3 | 1.9E-04 | 6.7E-04 | 4.2E-05 | 2.2E-05 | 3.2E-05 | 1.1E-05 | 3.3E-05  | 1.1E-04 | 7.2E-06 | 3.8E-06 | 5.6E-06 | 1.9E-06 | 5.7E+03 | 2.0E+04 | 1.2E+03 | 6.8E+02 | 9.8E+02 | 3.4E+02 |
|                                          | Site-4 | 2.2E-04 | 5.0E-04 | 4.6E-05 | 2.4E-05 | 2.3E-05 | 5.6E-06 | 3.8E-05  | 8.5E-05 | 7.8E-06 | 4.2E-06 | 4.1E-06 | 9.6E-07 | 6.7E+03 | 1.5E+04 | 1.3E+03 | 7.3E+02 | 7.1E+02 | 1.6E+02 |
|                                          | Site-5 | 1.9E-04 | 2.5E-04 | 3.5E-05 | 3.0E-05 | 2.1E-05 | 5.2E-06 | 3.2E-05  | 4.3E-05 | 6.0E-06 | 5.1E-06 | 3.6E-06 | 9.0E-07 | 5.7E+03 | 7.6E+03 | 1.0E+03 | 9.0E+02 | 6.4E+02 | 1.5E+02 |
|                                          | Site-6 | 2.8E-04 | 8.8E-04 | 3.8E-05 | 2.9E-05 | 1.5E-05 | 1.2E-05 | 4.8E-05  | 1.5E-04 | 6.5E-06 | 5.0E-06 | 2.5E-06 | 2.0E-06 | 8.5E+03 | 2.6E+04 | 1.1E+03 | 8.8E+02 | 4.4E+02 | 3.6E+02 |
|                                          | Site-7 | 2.0E-04 | 2.6E-04 | 4.7E-05 | 4.2E-05 | 3.4E-05 | 1.8E-05 | 3.5E-05  | 4.5E-05 | 8.1E-06 | 7.2E-06 | 5.8E-06 | 3.0E-06 | 6.1E+03 | 7.9E+03 | 1.4E+03 | 1.2E+03 | 1.0E+03 | 5.4E+02 |
|                                          | Site-8 | 1.9E-04 | 2.4E-04 | 2.3E-05 | 4.1E-05 | 3.2E-05 | 1.7E-05 | 3.2E-05  | 4.1E-05 | 4.0E-06 | 7.0E-06 | 5.6E-06 | 3.0E-06 | 5.6E+03 | 7.2E+03 | 7.1E+02 | 1.2E+03 | 9.8E+02 | 5.2E+02 |
|                                          | Site-9 | 2.7E-04 | 8.6E-04 | 2.7E-05 | 2.4E-05 | 3.0E-05 | 4.8E-06 | 4.6E-05  | 1.4E-04 | 4.7E-06 | 4.1E-06 | 5.2E-06 | 2.7E-06 | 8.1E+03 | 2.6E+04 | 8.2E+02 | 7.2E+02 | 9.1E+02 | 4.8E+02 |
|                                          | Site-1 | 4.0E-02 | 1.1E-03 | 4.5E-05 | 2.1E-02 | 3.0E-01 | 1.0E-03 | 1.2E-02  | 6.8E-04 | 2.2E-04 | 5.4E-03 | 6.0E-02 | 1.2E-05 | 3.2E+03 | 2.2E+04 | 9.0E+02 | 6.3E+02 | 5.0E+02 | 4.2E+02 |
|                                          | Site-2 | 4.0E-02 | 8.6E-04 | 4.3E-05 | 2.1E-02 | 3.0E-01 | 1.0E-03 | 1.2E-02  | 6.3E-04 | 2.2E-04 | 5.4E-03 | 6.0E-02 | 1.1E-05 | 6.0E+03 | 1.5E+04 | 8.7E+02 | 8.6E+02 | 9.2E+02 | 2.1E+02 |
|                                          | Site-3 | 4.0E-02 | 1.0E-03 | 5.7E-05 | 2.1E-02 | 3.0E-01 | 1.0E-03 | 1.2E-02  | 6.7E-04 | 2.2E-04 | 5.4E-03 | 6.0E-02 | 1.2E-05 | 5.7E+03 | 2.0E+04 | 1.2E+03 | 6.8E+02 | 9.8E+02 | 3.4E+02 |
|                                          | Site-4 | 4.0E-02 | 8.5E-04 | 6.1E-05 | 2.1E-02 | 3.0E-01 | 1.0E-03 | 1.2E-02  | 6.3E-04 | 2.3E-04 | 5.4E-03 | 6.0E-02 | 1.1E-05 | 6.7E+03 | 1.5E+04 | 1.3E+03 | 7.3E+02 | 7.1E+02 | 1.6E+02 |
|                                          | Site-5 | 4.0E-02 | 6.0E-04 | 5.0E-05 | 2.1E-02 | 3.0E-01 | 1.0E-03 | 1.2E-02  | 5.8E-04 | 2.2E-04 | 5.4E-03 | 6.0E-02 | 1.1E-05 | 5.7E+03 | 7.6E+03 | 1.0E+03 | 9.0E+02 | 6.4E+02 | 1.5E+02 |
|                                          | Site-6 | 4.0E-02 | 1.2E-03 | 5.3E-05 | 2.1E-02 | 3.0E-01 | 1.0E-03 | 1.2E-02  | 7.1E-04 | 2.2E-04 | 5.4E-03 | 6.0E-02 | 1.2E-05 | 8.5E+03 | 2.6E+04 | 1.1E+03 | 8.8E+02 | 4.4E+02 | 3.6E+02 |
|                                          | Site-7 | 4.0E-02 | 6.1E-04 | 6.2E-05 | 2.1E-02 | 3.0E-01 | 1.0E-03 | 1.2E-02  | 5.8E-04 | 2.3E-04 | 5.4E-03 | 6.0E-02 | 1.3E-05 | 6.1E+03 | 7.9E+03 | 1.4E+03 | 1.2E+03 | 1.0E+03 | 5.4E+02 |
|                                          | Site-8 | 4.0E-02 | 5.9E-04 | 3.8E-05 | 2.1E-02 | 3.0E-01 | 1.0E-03 | 1.2E-02  | 5.8E-04 | 2.2E-04 | 5.4E-03 | 6.0E-02 | 1.3E-05 | 5.6E+03 | 7.2E+03 | 7.1E+02 | 1.2E+03 | 9.8E+02 | 5.2E+02 |
|                                          | Site-9 | 4.0E-02 | 1.2E-03 | 4.2E-05 | 2.1E-02 | 3.0E-01 | 1.0E-03 | 1.2E-02  | 7.1E-04 | 2.2E-04 | 5.4E-03 | 6.0E-02 | 1.3E-05 | 8.1E+03 | 2.6E+04 | 8.2E+02 | 7.2E+02 | 9.1E+02 | 4.8E+02 |

**Table S8: Hazard Quotation (HQ) of heavy metals in PM<sub>10</sub> and surface soil**

| HQ                | Sites  | Infant |        |        |        |        |        | Children |        |        |        |        |        | Adult  |        |        |        |        |        |
|-------------------|--------|--------|--------|--------|--------|--------|--------|----------|--------|--------|--------|--------|--------|--------|--------|--------|--------|--------|--------|
|                   |        | Cu     | Pb     | Cr     | Ni     | Zn     | Cd     | Cu       | Pb     | Cr     | Ni     | Zn     | Cd     | Cu     | Pb     | Cr     | Ni     | Zn     | Cd     |
| PM <sub>10</sub>  |        |        |        |        |        |        |        |          |        |        |        |        |        |        |        |        |        |        |        |
| HQ Inhalation     | Site-1 | 4.E-09 | 9.E-07 | 7.E-06 | 2.E-09 | 1.E-10 | 7.E-09 | 1.E-09   | 3.E-07 | 2.E-06 | 8.E-10 | 3.E-11 | 2.E-09 | 1.E-09 | 4.E-07 | 3.E-06 | 9.E-10 | 4.E-11 | 3.E-09 |
|                   | Site-2 | 6.E-09 | 7.E-07 | 1.E-05 | 3.E-09 | 1.E-10 | 1.E-08 | 2.E-09   | 2.E-07 | 3.E-06 | 9.E-10 | 4.E-11 | 3.E-09 | 2.E-09 | 3.E-07 | 4.E-06 | 1.E-09 | 5.E-11 | 4.E-09 |
|                   | Site-3 | 3.E-09 | 6.E-07 | 6.E-06 | 1.E-09 | 8.E-11 | 5.E-09 | 9.E-10   | 2.E-07 | 2.E-06 | 5.E-10 | 3.E-11 | 2.E-09 | 1.E-09 | 2.E-07 | 2.E-06 | 5.E-10 | 3.E-11 | 2.E-09 |
|                   | Site-4 | 3.E-09 | 5.E-07 | 4.E-06 | 2.E-09 | 7.E-11 | 5.E-09 | 1.E-09   | 2.E-07 | 1.E-06 | 5.E-10 | 2.E-11 | 2.E-09 | 1.E-09 | 2.E-07 | 1.E-06 | 6.E-10 | 2.E-11 | 2.E-09 |
|                   | Site-5 | 3.E-09 | 8.E-07 | 6.E-06 | 1.E-09 | 7.E-11 | 4.E-09 | 1.E-09   | 3.E-07 | 2.E-06 | 5.E-10 | 2.E-11 | 1.E-09 | 1.E-09 | 3.E-07 | 2.E-06 | 5.E-10 | 3.E-11 | 2.E-09 |
|                   | Site-6 | 5.E-09 | 3.E-06 | 2.E-05 | 2.E-09 | 2.E-10 | 2.E-08 | 2.E-09   | 9.E-07 | 6.E-06 | 6.E-10 | 6.E-11 | 5.E-09 | 2.E-09 | 1.E-06 | 6.E-06 | 7.E-10 | 7.E-11 | 6.E-09 |
|                   | Site-7 | 5.E-09 | 1.E-06 | 9.E-06 | 9.E-10 | 8.E-11 | 4.E-09 | 2.E-09   | 3.E-07 | 3.E-06 | 3.E-10 | 3.E-11 | 1.E-09 | 2.E-09 | 4.E-07 | 3.E-06 | 4.E-10 | 3.E-11 | 1.E-09 |
|                   | Site-8 | 4.E-09 | 2.E-06 | 6.E-06 | 2.E-09 | 1.E-10 | 3.E-09 | 1.E-09   | 5.E-07 | 2.E-06 | 5.E-10 | 4.E-11 | 1.E-09 | 2.E-09 | 6.E-07 | 2.E-06 | 6.E-10 | 4.E-11 | 1.E-09 |
|                   | Site-9 | 3.E-09 | 7.E-07 | 7.E-06 | 1.E-09 | 8.E-11 | 2.E-09 | 1.E-09   | 2.E-07 | 2.E-06 | 5.E-10 | 3.E-11 | 7.E-10 | 1.E-09 | 3.E-07 | 2.E-06 | 5.E-10 | 3.E-11 | 8.E-10 |
| HQ Dermal contact | Site-1 | 5.E-04 | 2.E-02 | 2.E-02 | 3.E-04 | 2.E-05 | 3.E-02 | 1.E-03   | 5.E-02 | 4.E-02 | 7.E-04 | 4.E-05 | 6.E-02 | 5.E-04 | 2.E-02 | 2.E-02 | 3.E-04 | 2.E-05 | 3.E-02 |
|                   | Site-2 | 8.E-04 | 2.E-02 | 3.E-02 | 4.E-04 | 2.E-05 | 4.E-02 | 2.E-03   | 4.E-02 | 5.E-02 | 8.E-04 | 5.E-05 | 8.E-02 | 8.E-04 | 2.E-02 | 2.E-02 | 4.E-04 | 2.E-05 | 4.E-02 |
|                   | Site-3 | 3.E-04 | 2.E-02 | 1.E-02 | 2.E-04 | 2.E-05 | 2.E-02 | 7.E-04   | 3.E-02 | 3.E-02 | 4.E-04 | 3.E-05 | 4.E-02 | 3.E-04 | 1.E-02 | 1.E-02 | 2.E-04 | 1.E-05 | 2.E-02 |
|                   | Site-4 | 4.E-04 | 1.E-02 | 1.E-02 | 2.E-04 | 1.E-05 | 2.E-02 | 8.E-04   | 3.E-02 | 2.E-02 | 5.E-04 | 3.E-05 | 4.E-02 | 4.E-04 | 1.E-02 | 1.E-02 | 2.E-04 | 1.E-05 | 2.E-02 |
|                   | Site-5 | 4.E-04 | 2.E-02 | 2.E-02 | 2.E-04 | 1.E-05 | 2.E-02 | 8.E-04   | 5.E-02 | 3.E-02 | 5.E-04 | 3.E-05 | 4.E-02 | 4.E-04 | 2.E-02 | 2.E-02 | 2.E-04 | 1.E-05 | 2.E-02 |
|                   | Site-6 | 7.E-04 | 7.E-02 | 4.E-02 | 3.E-04 | 3.E-05 | 6.E-02 | 1.E-03   | 2.E-01 | 9.E-02 | 6.E-04 | 7.E-05 | 1.E-01 | 7.E-04 | 7.E-02 | 4.E-02 | 3.E-04 | 3.E-05 | 6.E-02 |
|                   | Site-7 | 6.E-04 | 3.E-02 | 2.E-02 | 1.E-04 | 2.E-05 | 2.E-02 | 1.E-03   | 6.E-02 | 5.E-02 | 3.E-04 | 3.E-05 | 3.E-02 | 6.E-04 | 3.E-02 | 2.E-02 | 1.E-04 | 2.E-05 | 2.E-02 |
|                   | Site-8 | 6.E-04 | 4.E-02 | 2.E-02 | 2.E-04 | 2.E-05 | 1.E-02 | 1.E-03   | 8.E-02 | 3.E-02 | 5.E-04 | 5.E-05 | 3.E-02 | 6.E-04 | 4.E-02 | 2.E-02 | 2.E-04 | 2.E-05 | 1.E-02 |
|                   | Site-9 | 4.E-04 | 2.E-02 | 2.E-02 | 2.E-04 | 2.E-05 | 9.E-03 | 8.E-04   | 4.E-02 | 4.E-02 | 5.E-04 | 3.E-05 | 2.E-02 | 4.E-04 | 2.E-02 | 2.E-02 | 2.E-04 | 1.E-05 | 9.E-03 |
| HQ Ingestion      | Site-1 | 8.E-03 | 2.E+00 | 2.E+01 | 5.E-03 | 2.E-04 | 1.E-02 | 1.E-03   | 3.E-01 | 3.E+00 | 8.E-04 | 4.E-05 | 3.E-03 | 2.E+05 | 6.E+07 | 5.E+08 | 1.E+05 | 6.E+03 | 4.E+05 |
|                   | Site-2 | 1.E-02 | 2.E+00 | 2.E+01 | 6.E-03 | 3.E-04 | 2.E-02 | 2.E-03   | 3.E-01 | 4.E+00 | 1.E-03 | 5.E-05 | 4.E-03 | 4.E+05 | 5.E+07 | 6.E+08 | 2.E+05 | 8.E+03 | 6.E+05 |
|                   | Site-3 | 6.E-03 | 1.E+00 | 1.E+01 | 3.E-03 | 2.E-04 | 1.E-02 | 1.E-03   | 2.E-01 | 2.E+00 | 5.E-04 | 3.E-05 | 2.E-03 | 2.E+05 | 4.E+07 | 4.E+08 | 9.E+04 | 5.E+03 | 3.E+05 |
|                   | Site-4 | 6.E-03 | 1.E+00 | 8.E+00 | 4.E-03 | 1.E-04 | 1.E-02 | 1.E-03   | 2.E-01 | 1.E+00 | 6.E-04 | 2.E-05 | 2.E-03 | 2.E+05 | 3.E+07 | 3.E+08 | 1.E+05 | 4.E+03 | 3.E+05 |
|                   | Site-5 | 6.E-03 | 2.E+00 | 1.E+01 | 3.E-03 | 1.E-04 | 1.E-02 | 1.E-03   | 3.E-01 | 2.E+00 | 5.E-04 | 3.E-05 | 2.E-03 | 2.E+05 | 6.E+07 | 4.E+08 | 9.E+04 | 4.E+03 | 3.E+05 |

| HQ                   | Sites  | Infant |        |        |        |        |        | Children |        |        |        |        |        | Adult  |        |        |        |        |        |
|----------------------|--------|--------|--------|--------|--------|--------|--------|----------|--------|--------|--------|--------|--------|--------|--------|--------|--------|--------|--------|
|                      |        | Cu     | Pb     | Cr     | Ni     | Zn     | Cd     | Cu       | Pb     | Cr     | Ni     | Zn     | Cd     | Cu     | Pb     | Cr     | Ni     | Zn     | Cd     |
|                      | Site-6 | 1.E-02 | 6.E+00 | 4.E+01 | 4.E-03 | 4.E-04 | 3.E-02 | 2.E-03   | 1.E+00 | 6.E+00 | 7.E-04 | 7.E-05 | 6.E-03 | 3.E+05 | 2.E+08 | 1.E+09 | 1.E+05 | 1.E+04 | 1.E+06 |
|                      | Site-7 | 1.E-02 | 2.E+00 | 2.E+01 | 2.E-03 | 2.E-04 | 9.E-03 | 2.E-03   | 4.E-01 | 3.E+00 | 3.E-04 | 3.E-05 | 1.E-03 | 3.E+05 | 7.E+07 | 6.E+08 | 6.E+04 | 5.E+03 | 3.E+05 |
|                      | Site-8 | 1.E-02 | 3.E+00 | 1.E+01 | 3.E-03 | 2.E-04 | 7.E-03 | 2.E-03   | 6.E-01 | 2.E+00 | 6.E-04 | 4.E-05 | 1.E-03 | 3.E+05 | 1.E+08 | 4.E+08 | 1.E+05 | 7.E+03 | 2.E+05 |
|                      | Site-9 | 7.E-03 | 2.E+00 | 1.E+01 | 3.E-03 | 2.E-04 | 0.E+00 | 1.E-03   | 3.E-01 | 2.E+00 | 5.E-04 | 3.E-05 | 8.E-04 | 2.E+05 | 5.E+07 | 4.E+08 | 9.E+04 | 5.E+03 | 1.E+05 |
| Surface soil         |        |        |        |        |        |        |        |          |        |        |        |        |        |        |        |        |        |        |        |
| HQ<br>Inhalation     | Site-1 | 1.E-09 | 1.E-06 | 1.E-06 | 5.E-10 | 3.E-11 | 6.E-09 | 4.E-10   | 3.E-07 | 3.E-07 | 2.E-10 | 9.E-12 | 2.E-09 | 5.E-10 | 4.E-07 | 4.E-07 | 2.E-10 | 1.E-11 | 2.E-09 |
|                      | Site-2 | 2.E-09 | 7.E-07 | 9.E-07 | 6.E-10 | 5.E-11 | 3.E-09 | 8.E-10   | 2.E-07 | 3.E-07 | 2.E-10 | 2.E-11 | 1.E-09 | 9.E-10 | 2.E-07 | 4.E-07 | 2.E-10 | 2.E-11 | 1.E-09 |
|                      | Site-3 | 2.E-09 | 9.E-07 | 1.E-06 | 5.E-10 | 5.E-11 | 5.E-09 | 7.E-10   | 3.E-07 | 5.E-07 | 2.E-10 | 2.E-11 | 2.E-09 | 8.E-10 | 3.E-07 | 5.E-07 | 2.E-10 | 2.E-11 | 2.E-09 |
|                      | Site-4 | 3.E-09 | 7.E-07 | 1.E-06 | 5.E-10 | 4.E-11 | 3.E-09 | 9.E-10   | 2.E-07 | 5.E-07 | 2.E-10 | 1.E-11 | 9.E-10 | 1.E-09 | 2.E-07 | 6.E-07 | 2.E-10 | 1.E-11 | 1.E-09 |
|                      | Site-5 | 2.E-09 | 3.E-07 | 1.E-06 | 7.E-10 | 3.E-11 | 2.E-09 | 7.E-10   | 1.E-07 | 4.E-07 | 2.E-10 | 1.E-11 | 8.E-10 | 8.E-10 | 1.E-07 | 4.E-07 | 2.E-10 | 1.E-11 | 9.E-10 |
|                      | Site-6 | 3.E-09 | 1.E-06 | 1.E-06 | 6.E-10 | 2.E-11 | 6.E-09 | 1.E-09   | 4.E-07 | 4.E-07 | 2.E-10 | 8.E-12 | 2.E-09 | 1.E-09 | 4.E-07 | 5.E-07 | 2.E-10 | 9.E-12 | 2.E-09 |
|                      | Site-7 | 2.E-09 | 3.E-07 | 2.E-06 | 9.E-10 | 5.E-11 | 8.E-09 | 8.E-10   | 1.E-07 | 5.E-07 | 3.E-10 | 2.E-11 | 3.E-09 | 9.E-10 | 1.E-07 | 6.E-07 | 3.E-10 | 2.E-11 | 3.E-09 |
|                      | Site-8 | 2.E-09 | 3.E-07 | 8.E-07 | 9.E-10 | 5.E-11 | 8.E-09 | 7.E-10   | 1.E-07 | 3.E-07 | 3.E-10 | 2.E-11 | 3.E-09 | 8.E-10 | 1.E-07 | 3.E-07 | 3.E-10 | 2.E-11 | 3.E-09 |
|                      | Site-9 | 3.E-09 | 1.E-06 | 9.E-07 | 5.E-10 | 5.E-11 | 7.E-09 | 1.E-09   | 4.E-07 | 3.E-07 | 2.E-10 | 2.E-11 | 2.E-09 | 1.E-09 | 4.E-07 | 3.E-07 | 2.E-10 | 2.E-11 | 3.E-09 |
| HQ<br>Dermal contact | Site-1 | 2.E-04 | 3.E-02 | 2.E-03 | 7.E-05 | 5.E-06 | 3.E-02 | 3.E-04   | 5.E-02 | 5.E-03 | 1.E-04 | 1.E-05 | 5.E-02 | 2.E-04 | 3.E-02 | 2.E-03 | 7.E-05 | 5.E-06 | 2.E-02 |
|                      | Site-2 | 3.E-04 | 2.E-02 | 2.E-03 | 1.E-04 | 9.E-06 | 1.E-02 | 6.E-04   | 4.E-02 | 5.E-03 | 2.E-04 | 2.E-05 | 3.E-02 | 3.E-04 | 2.E-02 | 2.E-03 | 1.E-04 | 9.E-06 | 1.E-02 |
|                      | Site-3 | 3.E-04 | 2.E-02 | 3.E-03 | 8.E-05 | 1.E-05 | 2.E-02 | 6.E-04   | 5.E-02 | 7.E-03 | 2.E-04 | 2.E-05 | 4.E-02 | 3.E-04 | 2.E-02 | 3.E-03 | 7.E-05 | 1.E-05 | 2.E-02 |
|                      | Site-4 | 3.E-04 | 2.E-02 | 4.E-03 | 8.E-05 | 7.E-06 | 1.E-02 | 7.E-04   | 4.E-02 | 8.E-03 | 2.E-04 | 2.E-05 | 2.E-02 | 3.E-04 | 2.E-02 | 4.E-03 | 8.E-05 | 7.E-06 | 1.E-02 |
|                      | Site-5 | 3.E-04 | 9.E-03 | 3.E-03 | 1.E-04 | 6.E-06 | 1.E-02 | 6.E-04   | 2.E-02 | 6.E-03 | 2.E-04 | 1.E-05 | 2.E-02 | 3.E-04 | 9.E-03 | 3.E-03 | 1.E-04 | 6.E-06 | 9.E-03 |
|                      | Site-6 | 4.E-04 | 3.E-02 | 3.E-03 | 1.E-04 | 5.E-06 | 2.E-02 | 9.E-04   | 6.E-02 | 7.E-03 | 2.E-04 | 9.E-06 | 5.E-02 | 4.E-04 | 3.E-02 | 3.E-03 | 1.E-04 | 4.E-06 | 2.E-02 |
|                      | Site-7 | 3.E-04 | 9.E-03 | 4.E-03 | 1.E-04 | 1.E-05 | 3.E-02 | 6.E-04   | 2.E-02 | 8.E-03 | 3.E-04 | 2.E-05 | 7.E-02 | 3.E-04 | 9.E-03 | 4.E-03 | 1.E-04 | 1.E-05 | 3.E-02 |
|                      | Site-8 | 3.E-04 | 8.E-03 | 2.E-03 | 1.E-04 | 1.E-05 | 3.E-02 | 6.E-04   | 2.E-02 | 4.E-03 | 3.E-04 | 2.E-05 | 7.E-02 | 3.E-04 | 8.E-03 | 2.E-03 | 1.E-04 | 1.E-05 | 3.E-02 |
|                      | Site-9 | 4.E-04 | 3.E-02 | 2.E-03 | 8.E-05 | 9.E-06 | 3.E-02 | 9.E-04   | 6.E-02 | 5.E-03 | 2.E-04 | 2.E-05 | 6.E-02 | 4.E-04 | 3.E-02 | 2.E-03 | 8.E-05 | 9.E-06 | 3.E-02 |
| HQ<br>Ingestion      | Site-1 | 3.E-03 | 2.E+00 | 2.E+00 | 1.E-03 | 6.E-05 | 1.E-02 | 5.E-04   | 4.E-01 | 4.E-01 | 2.E-04 | 1.E-05 | 2.E-03 | 8.E+04 | 6.E+07 | 6.E+07 | 3.E+04 | 2.E+03 | 4.E+05 |
|                      | Site-2 | 5.E-03 | 1.E+00 | 2.E+00 | 1.E-03 | 1.E-04 | 7.E-03 | 9.E-04   | 2.E-01 | 3.E-01 | 2.E-04 | 2.E-05 | 1.E-03 | 2.E+05 | 4.E+07 | 6.E+07 | 4.E+04 | 3.E+03 | 2.E+05 |

| HQ | Sites  | Infant |        |        |        |        |        | Children |        |        |        |        |        | Adult  |        |        |        |        |        |
|----|--------|--------|--------|--------|--------|--------|--------|----------|--------|--------|--------|--------|--------|--------|--------|--------|--------|--------|--------|
|    |        | Cu     | Pb     | Cr     | Ni     | Zn     | Cd     | Cu       | Pb     | Cr     | Ni     | Zn     | Cd     | Cu     | Pb     | Cr     | Ni     | Zn     | Cd     |
|    | Site-3 | 5.E-03 | 2.E+00 | 3.E+00 | 1.E-03 | 1.E-04 | 1.E-02 | 8.E-04   | 3.E-01 | 5.E-01 | 2.E-04 | 2.E-05 | 2.E-03 | 1.E+05 | 6.E+07 | 9.E+07 | 3.E+04 | 3.E+03 | 3.E+05 |
|    | Site-4 | 6.E-03 | 1.E+00 | 3.E+00 | 1.E-03 | 8.E-05 | 6.E-03 | 1.E-03   | 2.E-01 | 6.E-01 | 2.E-04 | 1.E-05 | 1.E-03 | 2.E+05 | 4.E+07 | 1.E+08 | 4.E+04 | 2.E+03 | 2.E+05 |
|    | Site-5 | 5.E-03 | 7.E-01 | 2.E+00 | 1.E-03 | 7.E-05 | 5.E-03 | 8.E-04   | 1.E-01 | 4.E-01 | 2.E-04 | 1.E-05 | 9.E-04 | 1.E+05 | 2.E+07 | 7.E+07 | 4.E+04 | 2.E+03 | 2.E+05 |
|    | Site-6 | 7.E-03 | 3.E+00 | 3.E+00 | 1.E-03 | 5.E-05 | 1.E-02 | 1.E-03   | 4.E-01 | 5.E-01 | 2.E-04 | 9.E-06 | 2.E-03 | 2.E+05 | 8.E+07 | 8.E+07 | 4.E+04 | 1.E+03 | 4.E+05 |
|    | Site-7 | 5.E-03 | 8.E-01 | 3.E+00 | 2.E-03 | 1.E-04 | 2.E-02 | 9.E-04   | 1.E-01 | 6.E-01 | 3.E-04 | 2.E-05 | 3.E-03 | 2.E+05 | 2.E+07 | 1.E+08 | 6.E+04 | 3.E+03 | 5.E+05 |
|    | Site-8 | 5.E-03 | 7.E-01 | 2.E+00 | 2.E-03 | 1.E-04 | 2.E-02 | 8.E-04   | 1.E-01 | 3.E-01 | 3.E-04 | 2.E-05 | 3.E-03 | 1.E+05 | 2.E+07 | 5.E+07 | 6.E+04 | 3.E+03 | 5.E+05 |
|    | Site-9 | 7.E-03 | 2.E+00 | 2.E+00 | 1.E-03 | 1.E-04 | 0.E+00 | 1.E-03   | 4.E-01 | 3.E-01 | 2.E-04 | 2.E-05 | 3.E-03 | 2.E+05 | 7.E+07 | 6.E+07 | 3.E+04 | 3.E+03 | 5.E+05 |

**Table S9: Hazard Index (HI) of heavy metals in PM<sub>10</sub> and surface soil**

| HQ                | Sites  | Infant     |                |           | Children   |                |           | Adult      |                |           | HI       |
|-------------------|--------|------------|----------------|-----------|------------|----------------|-----------|------------|----------------|-----------|----------|
|                   |        | Inhalation | Dermal contact | Ingestion | Inhalation | Dermal contact | Ingestion | Inhalation | Dermal contact | Ingestion |          |
| PM <sub>10</sub>  |        |            |                |           |            |                |           |            |                |           |          |
| Hazard Index (HI) | Site-1 | 8.29E-06   | 2.76E-06       | 3.12E-06  | 0.070      | 0.147          | 0.069     | 1.8E+01    | 3.1E+00        | 5.4E+08   | 5.42E+08 |
|                   | Site-2 | 1.06E-05   | 3.55E-06       | 4.00E-06  | 0.083      | 0.174          | 0.082     | 2.3E+01    | 4.0E+00        | 6.9E+08   | 6.95E+08 |
|                   | Site-3 | 6.14E-06   | 2.05E-06       | 2.31E-06  | 0.050      | 0.104          | 0.049     | 1.3E+01    | 2.3E+00        | 4.0E+08   | 4.01E+08 |
|                   | Site-4 | 4.36E-06   | 1.45E-06       | 1.64E-06  | 0.044      | 0.091          | 0.043     | 9.5E+00    | 1.6E+00        | 2.8E+08   | 2.84E+08 |
|                   | Site-5 | 7.10E-06   | 2.37E-06       | 2.67E-06  | 0.056      | 0.117          | 0.055     | 1.5E+01    | 2.7E+00        | 4.6E+08   | 4.64E+08 |
|                   | Site-6 | 1.94E-05   | 6.47E-06       | 7.29E-06  | 0.175      | 0.365          | 0.172     | 4.2E+01    | 7.3E+00        | 1.3E+09   | 1.27E+09 |
|                   | Site-7 | 9.63E-06   | 3.21E-06       | 3.62E-06  | 0.065      | 0.135          | 0.064     | 2.1E+01    | 3.6E+00        | 6.3E+08   | 6.29E+08 |
|                   | Site-8 | 7.55E-06   | 2.52E-06       | 2.84E-06  | 0.070      | 0.146          | 0.069     | 1.6E+01    | 2.8E+00        | 4.9E+08   | 4.93E+08 |
|                   | Site-9 | 7.36E-06   | 2.45E-06       | 2.77E-06  | 0.046      | 0.095          | 0.045     | 1.6E+01    | 2.7E+00        | 4.8E+08   | 4.80E+08 |
| Surface soil      |        |            |                |           |            |                |           |            |                |           |          |
| Hazard Index (HI) | Site-1 | 1.96E-06   | 6.53E-07       | 7.36E-07  | 0.054      | 0.112          | 0.053     | 4.2E+00    | 7.4E-01        | 1.3E+08   | 1.27E+08 |
|                   | Site-2 | 1.60E-06   | 5.33E-07       | 6.01E-07  | 0.033      | 0.069          | 0.033     | 3.5E+00    | 6.0E-01        | 1.0E+08   | 1.04E+08 |
|                   | Site-3 | 2.26E-06   | 7.52E-07       | 8.48E-07  | 0.048      | 0.099          | 0.047     | 4.9E+00    | 8.5E-01        | 1.5E+08   | 1.47E+08 |
|                   | Site-4 | 2.14E-06   | 7.13E-07       | 8.04E-07  | 0.031      | 0.066          | 0.031     | 4.7E+00    | 8.0E-01        | 1.4E+08   | 1.40E+08 |
|                   | Site-5 | 1.47E-06   | 4.89E-07       | 5.51E-07  | 0.022      | 0.045          | 0.021     | 3.2E+00    | 5.5E-01        | 9.6E+07   | 9.56E+07 |
|                   | Site-6 | 2.40E-06   | 8.00E-07       | 9.02E-07  | 0.056      | 0.117          | 0.055     | 5.2E+00    | 9.1E-01        | 1.6E+08   | 1.56E+08 |
|                   | Site-7 | 1.89E-06   | 6.30E-07       | 7.10E-07  | 0.046      | 0.096          | 0.045     | 4.1E+00    | 7.2E-01        | 1.2E+08   | 1.23E+08 |
|                   | Site-8 | 1.09E-06   | 3.63E-07       | 4.09E-07  | 0.043      | 0.089          | 0.042     | 2.4E+00    | 4.2E-01        | 7.1E+07   | 7.05E+07 |
|                   | Site-9 | 2.04E-06   | 6.79E-07       | 7.65E-07  | 0.062      | 0.129          | 0.061     | 4.4E+00    | 7.6E-01        | 1.3E+08   | 1.32E+08 |

**Table S10: Carcinogenic risk of each exposure pathway to heavy metals in PM<sub>10</sub> and surface soil**

| R                           | Sites  | Infant |        |        |    |    | Children |        |        |        |    | Adult |        |        |        |        |    |    |        |
|-----------------------------|--------|--------|--------|--------|----|----|----------|--------|--------|--------|----|-------|--------|--------|--------|--------|----|----|--------|
|                             |        | Cu     | Pb     | Cr     | Ni | Zn | Cd       | Cu     | Pb     | Cr     | Ni | Zn    | Cd     | Cu     | Pb     | Cr     | Ni | Zn | Cd     |
| PM <sub>10</sub>            |        |        |        |        |    |    |          |        |        |        |    |       |        |        |        |        |    |    |        |
| R <sub>Inhalation</sub>     | Site-1 | 8.E-09 | 3.E-10 | 5.E-12 |    |    | 1.E-12   | 3.E-09 | 9.E-11 | 2.E-12 |    |       | 4.E-13 | 3.E-09 | 1.E-10 | 2.E-12 |    |    | 4.E-13 |
|                             | Site-2 | 6.E-09 | 3.E-10 | 6.E-12 |    |    | 2.E-12   | 2.E-09 | 1.E-10 | 2.E-12 |    |       | 5.E-13 | 2.E-09 | 1.E-10 | 2.E-12 |    |    | 6.E-13 |
|                             | Site-3 | 5.E-09 | 2.E-10 | 3.E-12 |    |    | 8.E-13   | 2.E-09 | 6.E-11 | 1.E-12 |    |       | 3.E-13 | 2.E-09 | 7.E-11 | 1.E-12 |    |    | 3.E-13 |
|                             | Site-4 | 4.E-09 | 1.E-10 | 3.E-12 |    |    | 8.E-13   | 1.E-09 | 4.E-11 | 1.E-12 |    |       | 3.E-13 | 2.E-09 | 5.E-11 | 1.E-12 |    |    | 3.E-13 |
|                             | Site-5 | 7.E-09 | 2.E-10 | 3.E-12 |    |    | 7.E-13   | 2.E-09 | 7.E-11 | 1.E-12 |    |       | 2.E-13 | 3.E-09 | 8.E-11 | 1.E-12 |    |    | 3.E-13 |
|                             | Site-6 | 2.E-08 | 6.E-10 | 4.E-12 |    |    | 2.E-12   | 8.E-09 | 2.E-10 | 1.E-12 |    |       | 8.E-13 | 9.E-09 | 2.E-10 | 2.E-12 |    |    | 9.E-13 |
|                             | Site-7 | 9.E-09 | 3.E-10 | 2.E-12 |    |    | 6.E-13   | 3.E-09 | 1.E-10 | 7.E-13 |    |       | 2.E-13 | 3.E-09 | 1.E-10 | 8.E-13 |    |    | 2.E-13 |
|                             | Site-8 | 1.E-08 | 2.E-10 | 3.E-12 |    |    | 5.E-13   | 4.E-09 | 7.E-11 | 1.E-12 |    |       | 2.E-13 | 5.E-09 | 8.E-11 | 1.E-12 |    |    | 2.E-13 |
|                             | Site-9 | 6.E-09 | 2.E-10 | 3.E-12 |    |    | 4.E-13   | 2.E-09 | 8.E-11 | 1.E-12 |    |       | 1.E-13 | 2.E-09 | 9.E-11 | 1.E-12 |    |    | 1.E-13 |
| R <sub>Dermal contact</sub> | Site-1 | 2.E-03 | 8.E-06 | 2.E-06 |    |    | 4.E-08   | 3.E-03 | 2.E-05 | 5.E-06 |    |       | 9.E-08 | 1.E-03 | 8.E-06 | 2.E-06 |    |    | 4.E-08 |
|                             | Site-2 | 1.E-03 | 1.E-05 | 3.E-06 |    |    | 6.E-08   | 3.E-03 | 2.E-05 | 5.E-06 |    |       | 1.E-07 | 1.E-03 | 1.E-05 | 3.E-06 |    |    | 6.E-08 |
|                             | Site-3 | 9.E-04 | 6.E-06 | 1.E-06 |    |    | 3.E-08   | 2.E-03 | 1.E-05 | 3.E-06 |    |       | 7.E-08 | 9.E-04 | 6.E-06 | 1.E-06 |    |    | 3.E-08 |
|                             | Site-4 | 8.E-04 | 4.E-06 | 2.E-06 |    |    | 3.E-08   | 2.E-03 | 9.E-06 | 3.E-06 |    |       | 7.E-08 | 8.E-04 | 4.E-06 | 2.E-06 |    |    | 3.E-08 |
|                             | Site-5 | 1.E-03 | 7.E-06 | 1.E-06 |    |    | 3.E-08   | 3.E-03 | 1.E-05 | 3.E-06 |    |       | 6.E-08 | 1.E-03 | 7.E-06 | 1.E-06 |    |    | 3.E-08 |
|                             | Site-6 | 5.E-03 | 2.E-05 | 2.E-06 |    |    | 9.E-08   | 9.E-03 | 4.E-05 | 4.E-06 |    |       | 2.E-07 | 4.E-03 | 2.E-05 | 2.E-06 |    |    | 9.E-08 |
|                             | Site-7 | 2.E-03 | 1.E-05 | 9.E-07 |    |    | 2.E-08   | 3.E-03 | 2.E-05 | 2.E-06 |    |       | 5.E-08 | 2.E-03 | 1.E-05 | 9.E-07 |    |    | 2.E-08 |
|                             | Site-8 | 3.E-03 | 7.E-06 | 2.E-06 |    |    | 2.E-08   | 5.E-03 | 1.E-05 | 3.E-06 |    |       | 4.E-08 | 2.E-03 | 7.E-06 | 2.E-06 |    |    | 2.E-08 |
|                             | Site-9 | 1.E-03 | 7.E-06 | 1.E-06 |    |    | 1.E-08   | 3.E-03 | 2.E-05 | 3.E-06 |    |       | 3.E-08 | 1.E-03 | 7.E-06 | 1.E-06 |    |    | 1.E-08 |
| R <sub>Ingestion</sub>      | Site-1 | 8.E-02 | 5.E-04 | 1.E-04 |    |    | 2.E-06   | 1.E-02 | 8.E-05 | 2.E-05 |    |       | 4.E-07 | 3.E+06 | 1.E+04 | 4.E+03 |    |    | 7.E+01 |
|                             | Site-2 | 7.E-02 | 6.E-04 | 1.E-04 |    |    | 3.E-06   | 1.E-02 | 1.E-04 | 2.E-05 |    |       | 6.E-07 | 2.E+06 | 2.E+04 | 4.E+03 |    |    | 1.E+02 |
|                             | Site-3 | 5.E-02 | 3.E-04 | 8.E-05 |    |    | 2.E-06   | 9.E-03 | 6.E-05 | 1.E-05 |    |       | 3.E-07 | 2.E+06 | 1.E+04 | 2.E+03 |    |    | 5.E+01 |
|                             | Site-4 | 5.E-02 | 2.E-04 | 9.E-05 |    |    | 2.E-06   | 8.E-03 | 4.E-05 | 2.E-05 |    |       | 3.E-07 | 1.E+06 | 7.E+03 | 3.E+03 |    |    | 5.E+01 |
|                             | Site-5 | 8.E-02 | 4.E-04 | 8.E-05 |    |    | 2.E-06   | 1.E-02 | 7.E-05 | 1.E-05 |    |       | 3.E-07 | 2.E+06 | 1.E+04 | 2.E+03 |    |    | 5.E+01 |



| R                           | Sites  | Infant |        |        |    |        | Children |        |        |        |    | Adult  |    |        |        |        |    |        |    |
|-----------------------------|--------|--------|--------|--------|----|--------|----------|--------|--------|--------|----|--------|----|--------|--------|--------|----|--------|----|
|                             |        | Cu     | Pb     | Cr     | Ni | Zn     | Cd       | Cu     | Pb     | Cr     | Ni | Zn     | Cd | Cu     | Pb     | Cr     | Ni | Zn     | Cd |
|                             | Site-6 | 2.E-01 | 1.E-03 | 1.E-04 |    | 5.E-06 |          | 4.E-02 | 2.E-04 | 2.E-05 |    | 9.E-07 |    | 7.E+06 | 3.E+04 | 3.E+03 |    | 2.E+02 |    |
|                             | Site-7 | 9.E-02 | 5.E-04 | 5.E-05 |    | 1.E-06 |          | 2.E-02 | 9.E-05 | 9.E-06 |    | 2.E-07 |    | 3.E+06 | 2.E+04 | 2.E+03 |    | 4.E+01 |    |
|                             | Site-8 | 1.E-01 | 4.E-04 | 9.E-05 |    | 1.E-06 |          | 2.E-02 | 6.E-05 | 1.E-05 |    | 2.E-07 |    | 4.E+06 | 1.E+04 | 3.E+03 |    | 3.E+01 |    |
|                             | Site-9 | 7.E-02 | 4.E-04 | 8.E-05 |    | 8.E-07 |          | 1.E-02 | 7.E-05 | 1.E-05 |    | 1.E-07 |    | 2.E+06 | 1.E+04 | 2.E+03 |    | 2.E+01 |    |
| Surface soil                |        |        |        |        |    |        |          |        |        |        |    |        |    |        |        |        |    |        |    |
| R <sub>Inhalation</sub>     | Site-1 | 8.E-09 | 3.E-11 | 1.E-12 |    | 1.E-12 |          | 3.E-09 | 1.E-11 | 3.E-13 |    | 3.E-13 |    | 3.E-09 | 1.E-11 | 4.E-13 |    | 4.E-13 |    |
|                             | Site-2 | 6.E-09 | 3.E-11 | 1.E-12 |    | 5.E-13 |          | 2.E-09 | 1.E-11 | 4.E-13 |    | 2.E-13 |    | 2.E-09 | 1.E-11 | 5.E-13 |    | 2.E-13 |    |
|                             | Site-3 | 7.E-09 | 5.E-11 | 1.E-12 |    | 8.E-13 |          | 2.E-09 | 2.E-11 | 4.E-13 |    | 3.E-13 |    | 3.E-09 | 2.E-11 | 4.E-13 |    | 3.E-13 |    |
|                             | Site-4 | 5.E-09 | 5.E-11 | 1.E-12 |    | 4.E-13 |          | 2.E-09 | 2.E-11 | 4.E-13 |    | 1.E-13 |    | 2.E-09 | 2.E-11 | 4.E-13 |    | 2.E-13 |    |
|                             | Site-5 | 3.E-09 | 4.E-11 | 1.E-12 |    | 4.E-13 |          | 9.E-10 | 1.E-11 | 5.E-13 |    | 1.E-13 |    | 1.E-09 | 1.E-11 | 5.E-13 |    | 1.E-13 |    |
|                             | Site-6 | 1.E-08 | 4.E-11 | 1.E-12 |    | 9.E-13 |          | 3.E-09 | 1.E-11 | 5.E-13 |    | 3.E-13 |    | 4.E-09 | 2.E-11 | 5.E-13 |    | 3.E-13 |    |
|                             | Site-7 | 3.E-09 | 5.E-11 | 2.E-12 |    | 1.E-12 |          | 1.E-09 | 2.E-11 | 7.E-13 |    | 4.E-13 |    | 1.E-09 | 2.E-11 | 7.E-13 |    | 5.E-13 |    |
|                             | Site-8 | 3.E-09 | 3.E-11 | 2.E-12 |    | 1.E-12 |          | 9.E-10 | 9.E-12 | 6.E-13 |    | 4.E-13 |    | 1.E-09 | 1.E-11 | 7.E-13 |    | 5.E-13 |    |
|                             | Site-9 | 9.E-09 | 3.E-11 | 1.E-12 |    | 1.E-12 |          | 3.E-09 | 1.E-11 | 4.E-13 |    | 4.E-13 |    | 4.E-09 | 1.E-11 | 4.E-13 |    | 4.E-13 |    |
| R <sub>Dermal contact</sub> | Site-1 | 2.E-03 | 1.E-06 | 5.E-07 |    | 4.E-08 |          | 3.E-03 | 2.E-06 | 1.E-06 |    | 8.E-08 |    | 2.E-03 | 1.E-06 | 5.E-07 |    | 4.E-08 |    |
|                             | Site-2 | 1.E-03 | 1.E-06 | 6.E-07 |    | 2.E-08 |          | 2.E-03 | 2.E-06 | 1.E-06 |    | 4.E-08 |    | 1.E-03 | 1.E-06 | 6.E-07 |    | 2.E-08 |    |
|                             | Site-3 | 1.E-03 | 2.E-06 | 5.E-07 |    | 3.E-08 |          | 3.E-03 | 3.E-06 | 1.E-06 |    | 7.E-08 |    | 1.E-03 | 2.E-06 | 5.E-07 |    | 3.E-08 |    |
|                             | Site-4 | 1.E-03 | 2.E-06 | 5.E-07 |    | 2.E-08 |          | 2.E-03 | 3.E-06 | 1.E-06 |    | 3.E-08 |    | 1.E-03 | 2.E-06 | 5.E-07 |    | 2.E-08 |    |
|                             | Site-5 | 5.E-04 | 1.E-06 | 7.E-07 |    | 2.E-08 |          | 1.E-03 | 3.E-06 | 1.E-06 |    | 3.E-08 |    | 5.E-04 | 1.E-06 | 6.E-07 |    | 1.E-08 |    |
|                             | Site-6 | 2.E-03 | 1.E-06 | 6.E-07 |    | 4.E-08 |          | 4.E-03 | 3.E-06 | 1.E-06 |    | 7.E-08 |    | 2.E-03 | 1.E-06 | 6.E-07 |    | 3.E-08 |    |
|                             | Site-7 | 6.E-04 | 2.E-06 | 9.E-07 |    | 5.E-08 |          | 1.E-03 | 4.E-06 | 2.E-06 |    | 1.E-07 |    | 6.E-04 | 2.E-06 | 9.E-07 |    | 5.E-08 |    |
|                             | Site-8 | 5.E-04 | 9.E-07 | 9.E-07 |    | 5.E-08 |          | 1.E-03 | 2.E-06 | 2.E-06 |    | 1.E-07 |    | 5.E-04 | 8.E-07 | 9.E-07 |    | 5.E-08 |    |
|                             | Site-9 | 2.E-03 | 1.E-06 | 5.E-07 |    | 5.E-08 |          | 4.E-03 | 2.E-06 | 1.E-06 |    | 1.E-07 |    | 2.E-03 | 1.E-06 | 5.E-07 |    | 5.E-08 |    |
| R <sub>Ingestion</sub>      | Site-1 | 9.E-02 | 6.E-05 | 3.E-05 |    | 2.E-06 |          | 2.E-02 | 1.E-05 | 4.E-06 |    | 4.E-07 |    | 3.E+06 | 2.E+03 | 8.E+02 |    | 7.E+01 |    |
|                             | Site-2 | 6.E-02 | 6.E-05 | 3.E-05 |    | 1.E-06 |          | 1.E-02 | 1.E-05 | 6.E-06 |    | 2.E-07 |    | 2.E+06 | 2.E+03 | 1.E+03 |    | 3.E+01 |    |

| R | Sites  | Infant |        |        |    |        | Children |        |        |        |    | Adult  |    |        |        |        |    |        |    |
|---|--------|--------|--------|--------|----|--------|----------|--------|--------|--------|----|--------|----|--------|--------|--------|----|--------|----|
|   |        | Cu     | Pb     | Cr     | Ni | Zn     | Cd       | Cu     | Pb     | Cr     | Ni | Zn     | Cd | Cu     | Pb     | Cr     | Ni | Zn     | Cd |
|   | Site-3 | 8.E-02 | 8.E-05 | 3.E-05 |    | 2.E-06 |          | 1.E-02 | 1.E-05 | 5.E-06 |    | 3.E-07 |    | 2.E+06 | 3.E+03 | 8.E+02 |    | 5.E+01 |    |
|   | Site-4 | 6.E-02 | 9.E-05 | 3.E-05 |    | 9.E-07 |          | 1.E-02 | 2.E-05 | 5.E-06 |    | 2.E-07 |    | 2.E+06 | 3.E+03 | 9.E+02 |    | 3.E+01 |    |
|   | Site-5 | 3.E-02 | 7.E-05 | 4.E-05 |    | 8.E-07 |          | 5.E-03 | 1.E-05 | 6.E-06 |    | 1.E-07 |    | 9.E+05 | 2.E+03 | 1.E+03 |    | 3.E+01 |    |
|   | Site-6 | 1.E-01 | 8.E-05 | 4.E-05 |    | 2.E-06 |          | 2.E-02 | 1.E-05 | 6.E-06 |    | 3.E-07 |    | 3.E+06 | 2.E+03 | 1.E+03 |    | 6.E+01 |    |
|   | Site-7 | 3.E-02 | 1.E-04 | 5.E-05 |    | 3.E-06 |          | 5.E-03 | 2.E-05 | 9.E-06 |    | 5.E-07 |    | 9.E+05 | 3.E+03 | 1.E+03 |    | 9.E+01 |    |
|   | Site-8 | 3.E-02 | 5.E-05 | 5.E-05 |    | 3.E-06 |          | 5.E-03 | 8.E-06 | 8.E-06 |    | 5.E-07 |    | 8.E+05 | 1.E+03 | 1.E+03 |    | 8.E+01 |    |
|   | Site-9 | 1.E-01 | 6.E-05 | 3.E-05 |    | 3.E-06 |          | 2.E-02 | 9.E-06 | 5.E-06 |    | 4.E-07 |    | 3.E+06 | 2.E+03 | 9.E+02 |    | 8.E+01 |    |

**Table S11: The Carcinogenic risk index (RI) of heavy metals in PM<sub>10</sub> and surface soil**

| R                           | Sites  | Infant     |                |           | Children   |                |           | Adult      |                |           | RI       |
|-----------------------------|--------|------------|----------------|-----------|------------|----------------|-----------|------------|----------------|-----------|----------|
|                             |        | Inhalation | Dermal contact | Ingestion | Inhalation | Dermal contact | Ingestion | Inhalation | Dermal contact | Ingestion |          |
| PM <sub>10</sub>            |        |            |                |           |            |                |           |            |                |           |          |
| Total carcinogenic risk (R) | Site-1 | 8.03E-09   | 0.002          | 8.4E-02   | 2.68E-09   | 0.003          | 1.4E-02   | 3.02E-09   | 0.002          | 2.5E+06   | 2.53E+06 |
|                             | Site-2 | 6.51E-09   | 0.001          | 6.7E-02   | 2.17E-09   | 0.003          | 1.1E-02   | 2.45E-09   | 0.001          | 2.0E+06   | 2.01E+06 |
|                             | Site-3 | 5.04E-09   | 0.001          | 5.3E-02   | 1.68E-09   | 0.002          | 9.0E-03   | 1.89E-09   | 0.001          | 1.6E+06   | 1.58E+06 |
|                             | Site-4 | 4.46E-09   | 0.001          | 4.7E-02   | 1.49E-09   | 0.002          | 8.0E-03   | 1.68E-09   | 0.001          | 1.4E+06   | 1.41E+06 |
|                             | Site-5 | 7.25E-09   | 0.001          | 7.6E-02   | 2.42E-09   | 0.003          | 1.3E-02   | 2.72E-09   | 0.001          | 2.3E+06   | 2.28E+06 |
|                             | Site-6 | 2.37E-08   | 0.005          | 2.5E-01   | 7.89E-09   | 0.009          | 4.3E-02   | 8.90E-09   | 0.004          | 7.5E+06   | 7.48E+06 |
|                             | Site-7 | 8.83E-09   | 0.002          | 9.2E-02   | 2.94E-09   | 0.003          | 1.6E-02   | 3.32E-09   | 0.002          | 2.8E+06   | 2.77E+06 |
|                             | Site-8 | 1.32E-08   | 0.003          | 1.4E-01   | 4.41E-09   | 0.005          | 2.4E-02   | 4.97E-09   | 0.003          | 4.2E+06   | 4.21E+06 |
|                             | Site-9 | 6.45E-09   | 0.001          | 6.7E-02   | 2.15E-09   | 0.003          | 1.2E-02   | 2.42E-09   | 0.001          | 2.0E+06   | 2.02E+06 |
| Surface soil                |        |            |                |           |            |                |           |            |                |           |          |
| Total carcinogenic risk (R) | Site-1 | 8.20E-09   | 0.002          | 8.8E-02   | 2.73E-09   | 0.003          | 1.5E-02   | 3.08E-09   | 0.002          | 2.6E+06   | 2.64E+06 |
|                             | Site-2 | 5.54E-09   | 0.001          | 5.9E-02   | 1.85E-09   | 0.002          | 1.0E-02   | 2.08E-09   | 0.001          | 1.8E+06   | 1.78E+06 |
|                             | Site-3 | 7.44E-09   | 0.001          | 8.0E-02   | 2.48E-09   | 0.003          | 1.4E-02   | 2.80E-09   | 0.001          | 2.4E+06   | 2.39E+06 |
|                             | Site-4 | 5.52E-09   | 0.001          | 5.9E-02   | 1.84E-09   | 0.002          | 1.0E-02   | 2.07E-09   | 0.001          | 1.8E+06   | 1.77E+06 |
|                             | Site-5 | 2.82E-09   | 0.001          | 3.0E-02   | 9.41E-10   | 0.001          | 5.2E-03   | 1.06E-09   | 0.001          | 9.0E+05   | 9.01E+05 |
|                             | Site-6 | 9.71E-09   | 0.002          | 1.0E-01   | 3.24E-09   | 0.004          | 1.8E-02   | 3.65E-09   | 0.002          | 3.1E+06   | 3.12E+06 |
|                             | Site-7 | 2.94E-09   | 0.001          | 3.1E-02   | 9.81E-10   | 0.001          | 5.4E-03   | 1.11E-09   | 0.001          | 9.4E+05   | 9.36E+05 |
|                             | Site-8 | 2.65E-09   | 0.001          | 2.8E-02   | 8.84E-10   | 0.001          | 4.9E-03   | 9.97E-10   | 0.001          | 8.5E+05   | 8.50E+05 |
|                             | Site-9 | 9.52E-09   | 0.002          | 1.0E-01   | 3.17E-09   | 0.004          | 1.8E-02   | 3.58E-09   | 0.002          | 3.1E+06   | 3.07E+06 |

## Figures

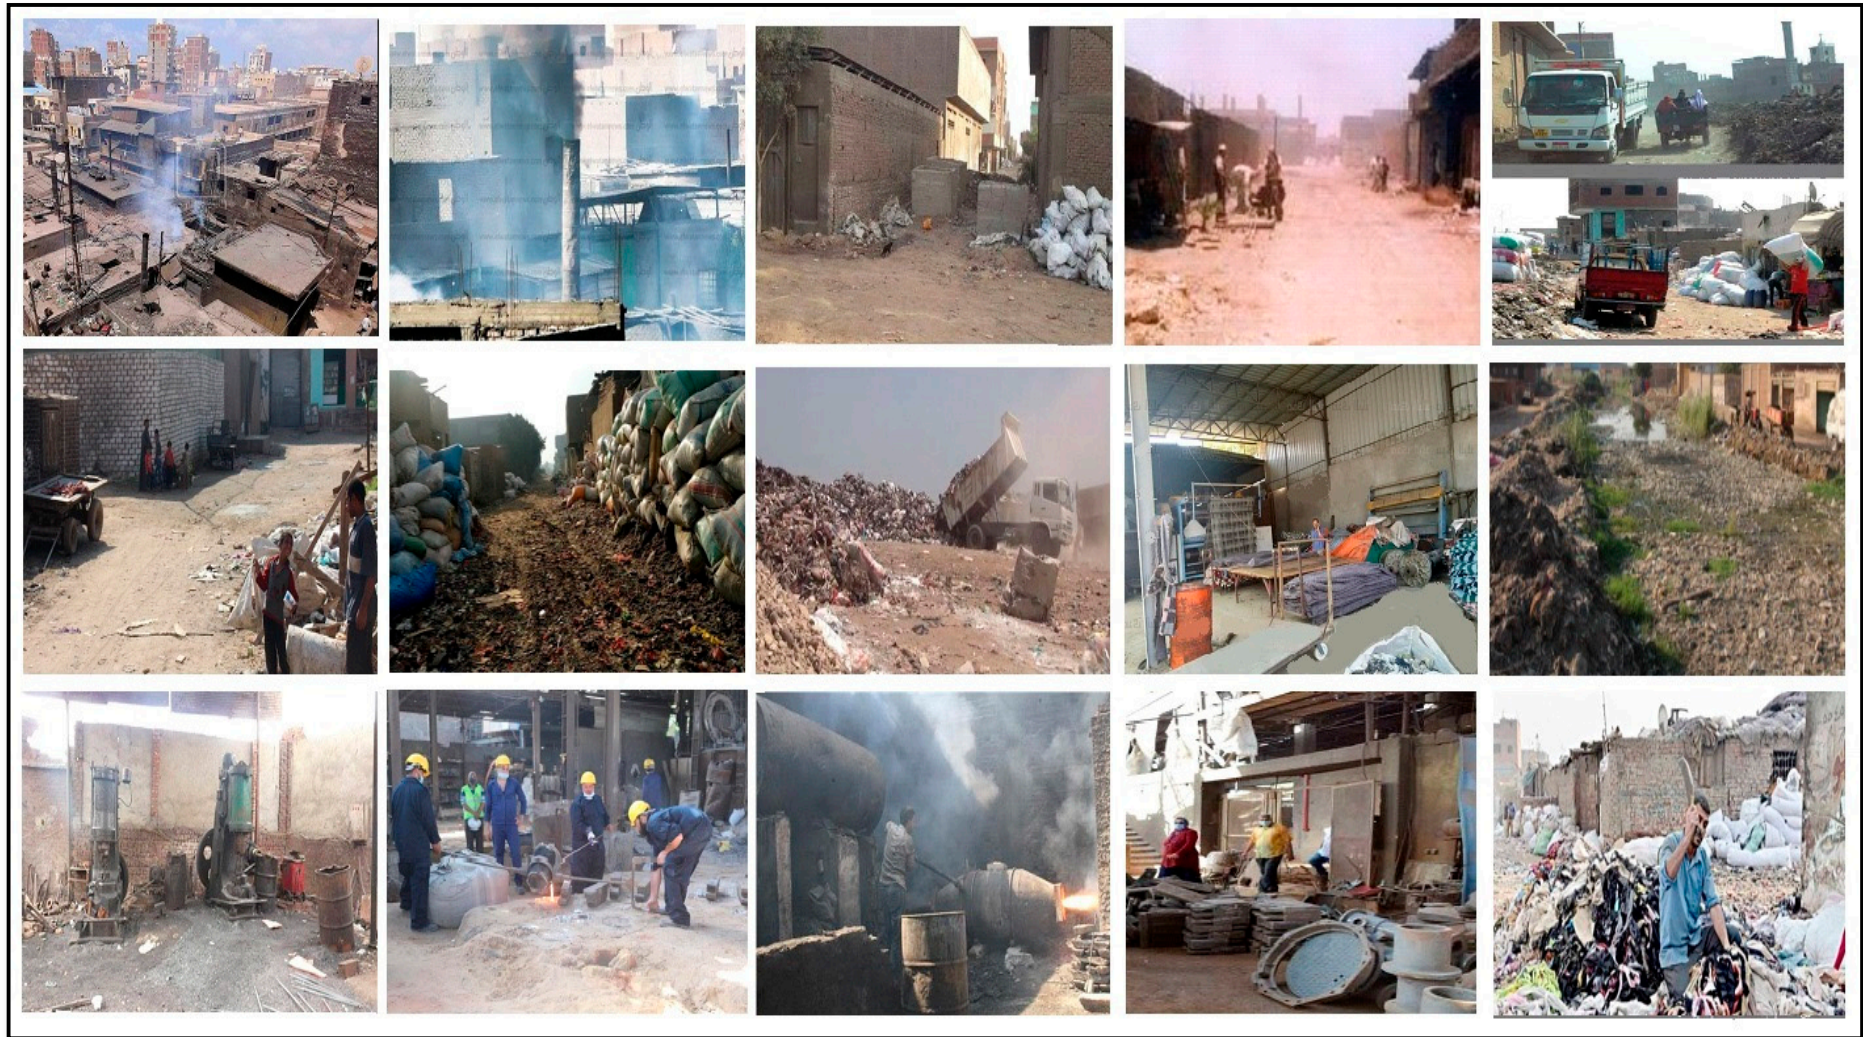

Figure S1: Gallery of workshops and factories photos in Al-Akrasha area

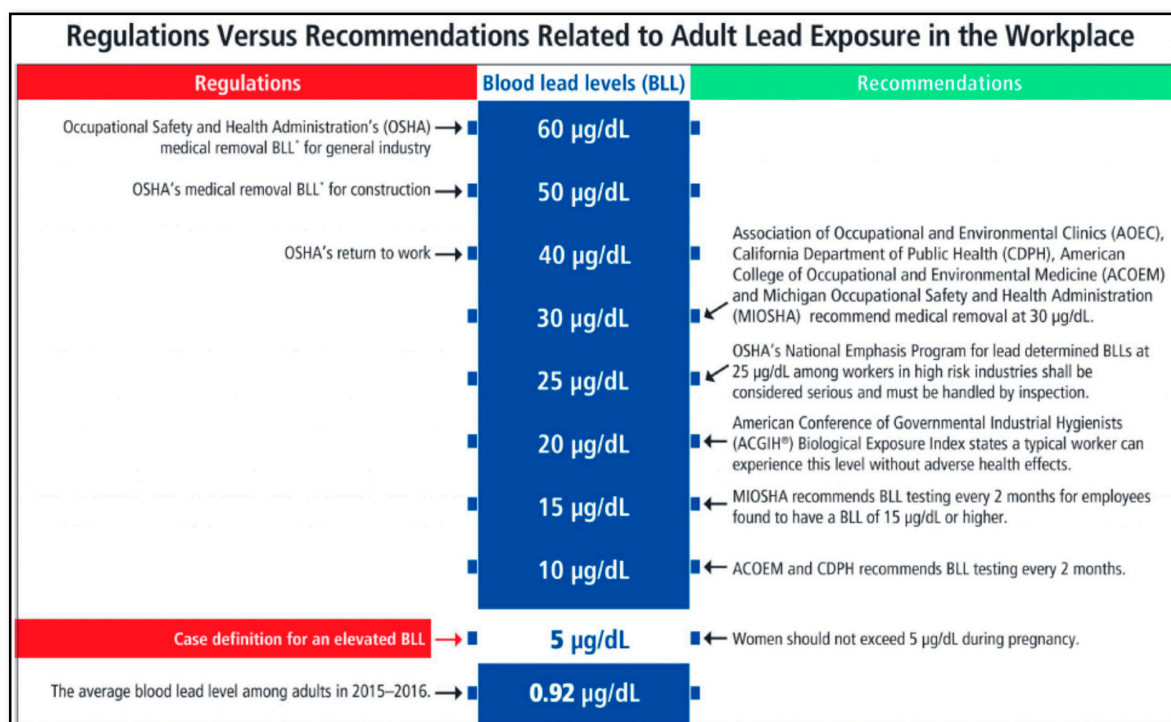

Figure S2: Regulations versus recommendations related to adult lead exposure in workplace [125-128].



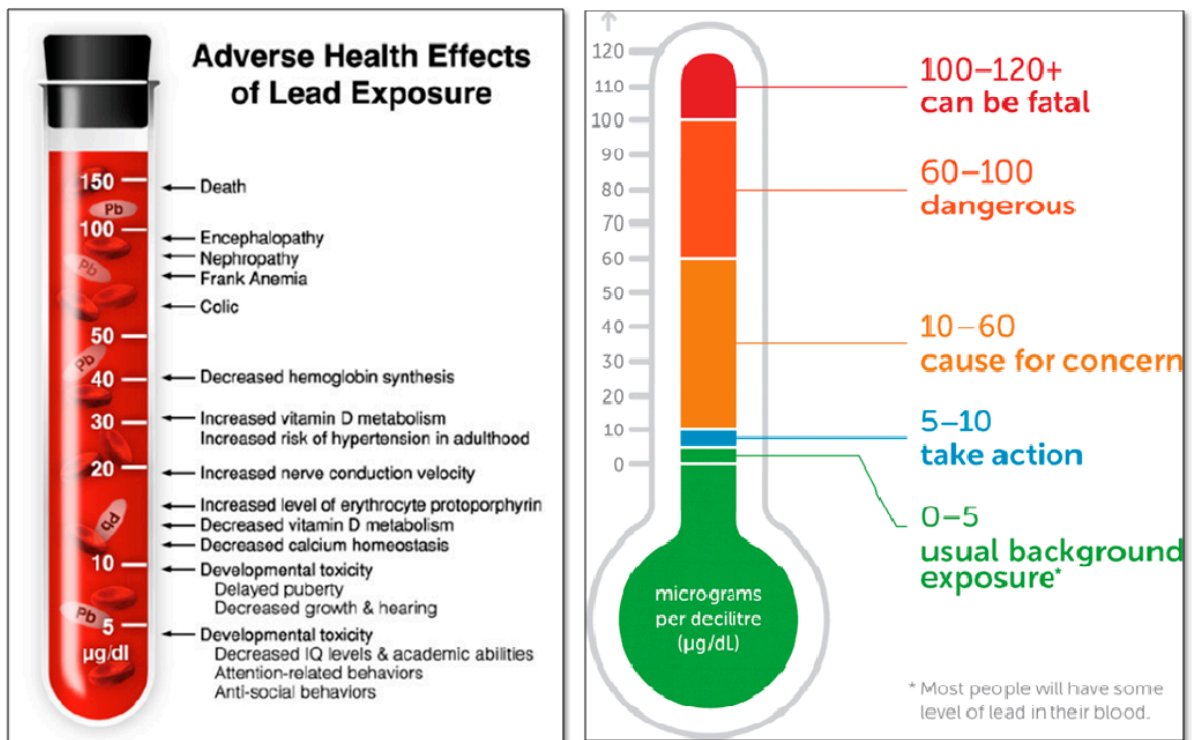

Figure S3: Adverse Health Effects of Lead Exposure [129-130].

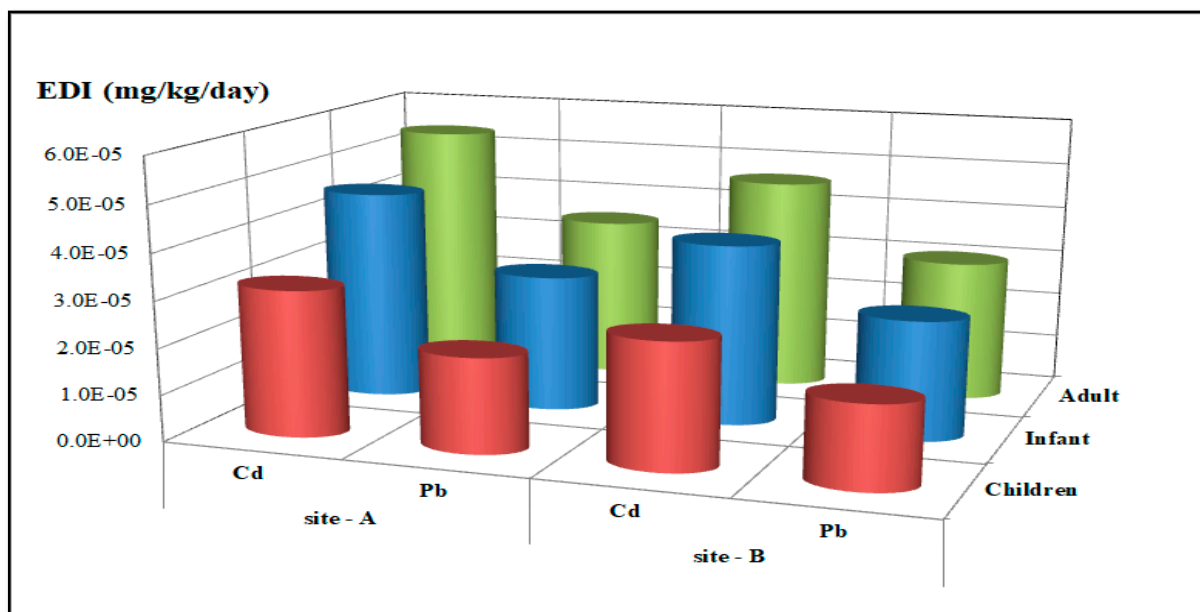

Figure S4: The Estimated of Daily Intake (EDI) for heavy metals (Pb and Cd) in edible fish of tilapia samples, which collected from Ismailia canal at two sites near Al-Akrasha region during 2019-2020.

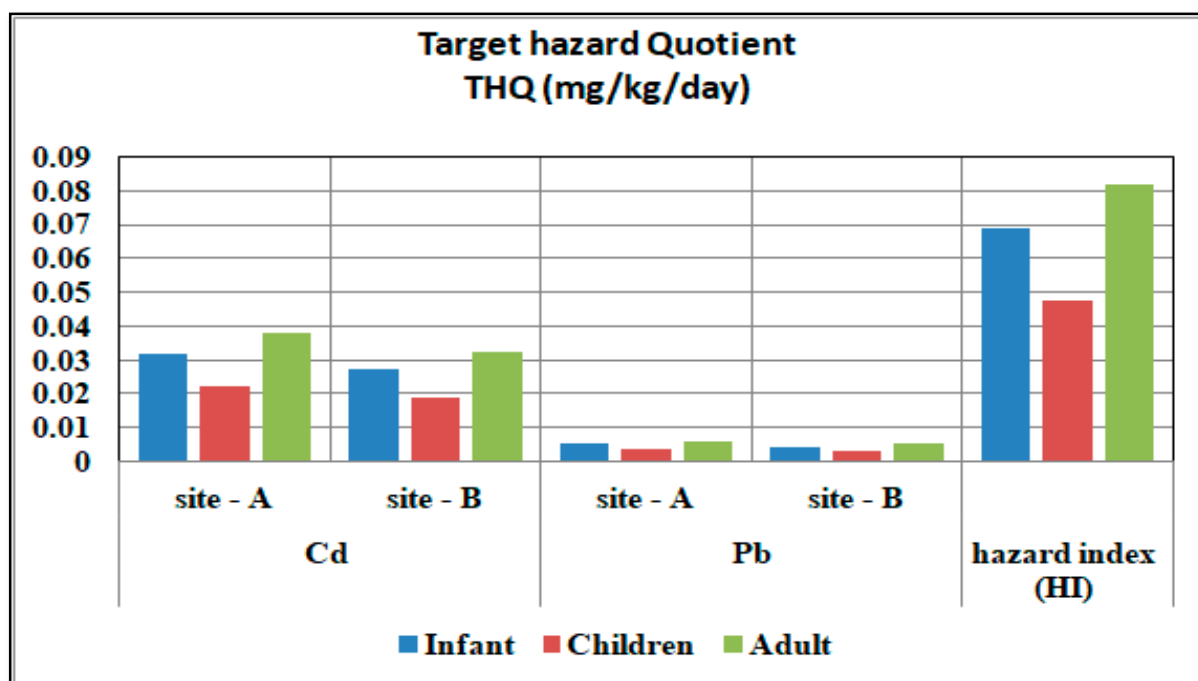

Figure S5: The Target hazard Quotient (THQ) and the hazard index (HI) for heavy metals (Pb and Cd) in edible fish of tilapia samples, which collected from Ismailia canal at two sites near Al-Akrasha region during 2019-2020.



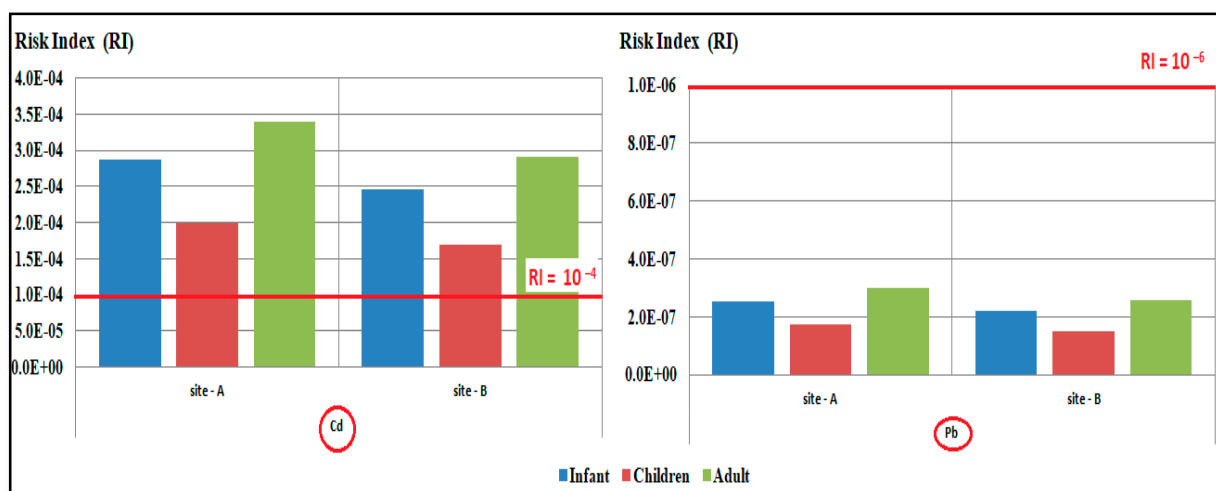

Figure S6: The risk index (RI) for heavy metals (Pb and Cd) in edible fish of tilapia samples, which collected from Ismailia canal at two sites near Al-Akrasha region during 2019-2020.

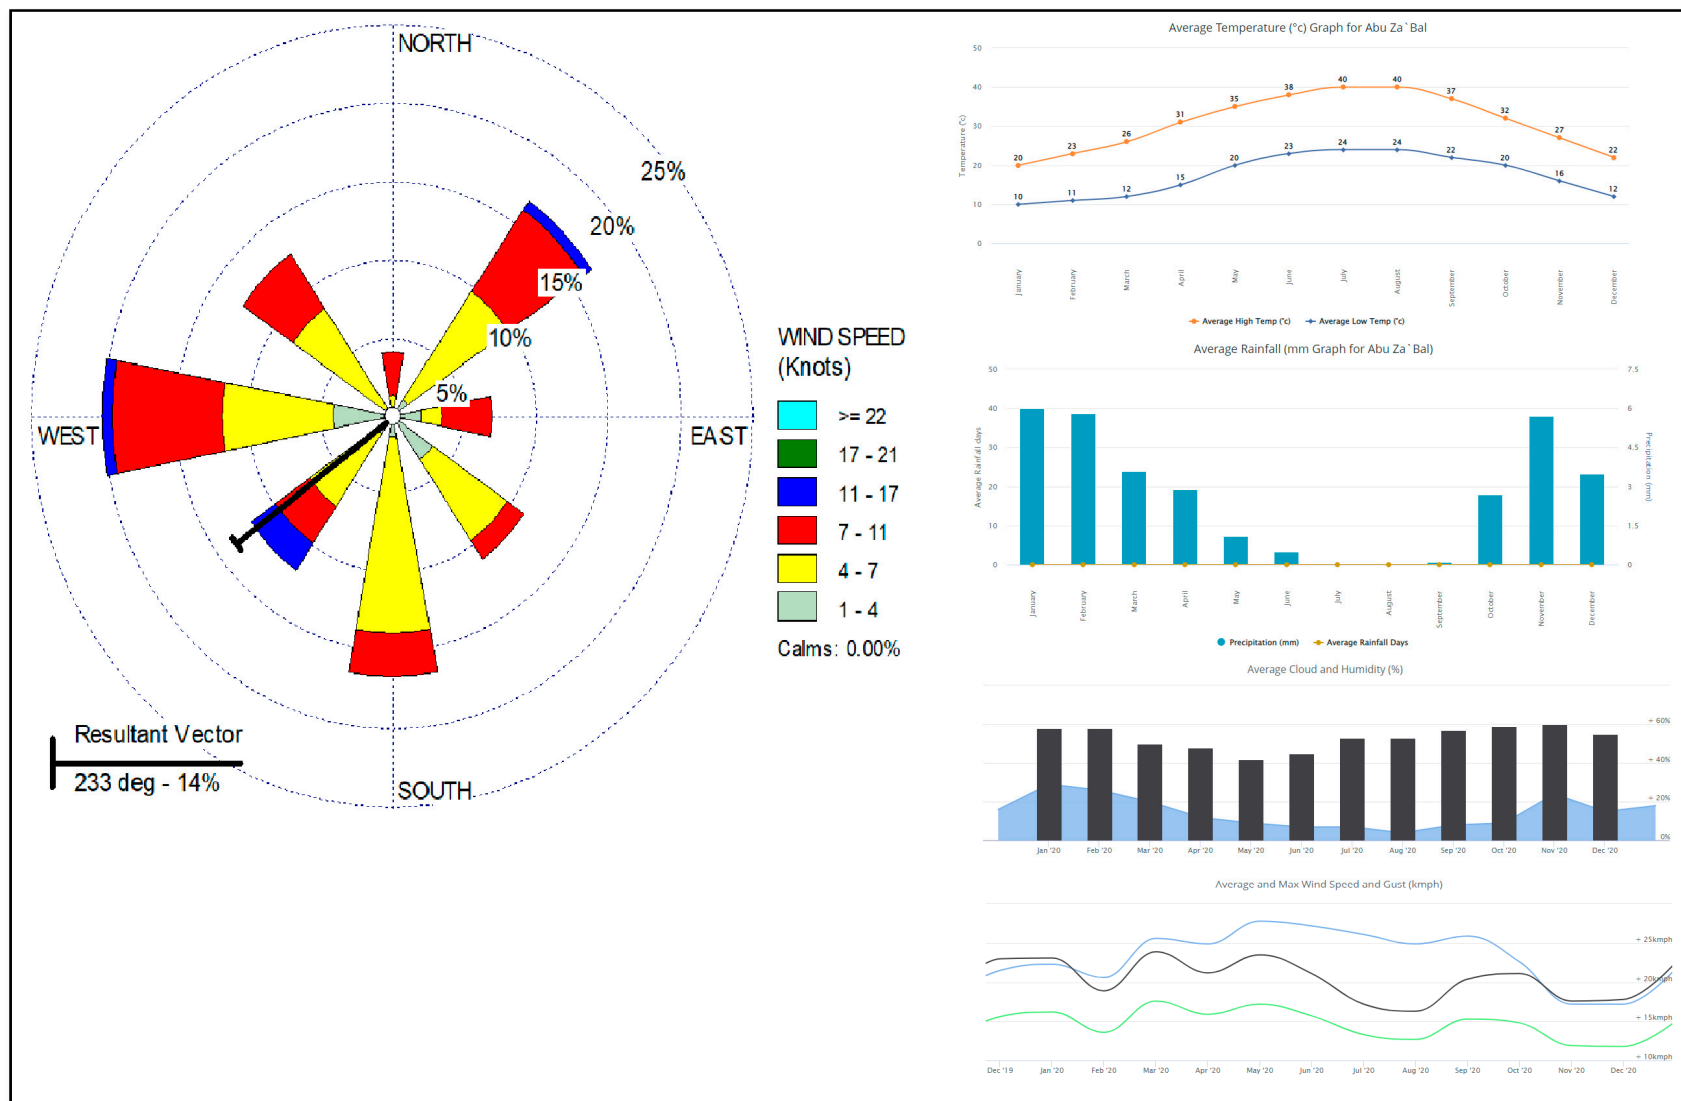

Figure S7: The meteorological parameters of Al-Akrasha area during 2020.

## References

1. Rastmanesh, F.; Moore, F.; Kopaei, M. K.; Keshavarzi, B.; Behrouz, M. Heavy metal enrichment of soil in Sarcheshmeh copper complex, Kerman Iran. *Environ. Earth Sci.* 2010, 62: 329-336. <https://doi.org/10.1007/s12665-010-0526-2>.
2. Manoj, K.; Kumer, B.; Padhy, P. K. Characterization of materials in water and sediments of Subarnarekha River along the projects sites in Lower Basin, India. *Universal Journal of Environmental Research and Technology.* 2012, 2(5): 402-410. [www.environmentaljournal.org](http://www.environmentaljournal.org).
3. Muller, G. The heavy metal pollution of the sediments of Neckars and its tributary: An Inventory. *Chemiker Zeitung.* 1981, 105: 157-164.
4. Ahdy, H. H. H.; Khaled, A. Heavy metals contamination in sediments of the Western Part of Egyptian Mediterranean Sea. *Aust. J. Basic and Applied Sci.* 2009, 3(4): 3330-3336. [Introduction \(ajbasweb.com\)](http://www.ajbasweb.com).
5. Sherif, A. E. A.; Atwany, A. M. Environmental Risk Assessment for Soil and Plants Pollution Resulting of Emitted Dust from Industrial Activities. *Nat Sci.* 2019, 17(10): 238-249. <https://doi.org/10.7537/marsnsj171019.31>.
6. Zhang, W.; Liu, X.; Cheng, H.; Zeng, E. Y.; Hu, Y. Heavy metal pollution in sediments of a typical mariculture zone in South China. *Marine Pollution Bulletin.* 2012, 64(4): 712–720. <https://doi.org/10.1016/j.marpolbul.2012.01.042>.
7. Singh, R.; Das, U.; Prasad, B.; Jha, S. Monitoring of dust pollution by leaves. *Poll Res.* 2002, 21(1):13–6. (6) Monitoring of dust pollution by leaves ([researchgate.net](http://researchgate.net)).
8. Sidoumou, Z. Qualite des eaux du littoral mauritanien: etude des metaux traces chez deux mollusques bivalves ' Venus 'errucosa et Donax rugosus. Thesis, University of NiceSophia-Antipolis, France. 1991. <https://api.semanticscholar.org/CorpusID:128126374>.
9. Fu, L.; Lu, X.; Niu, K.; Tan, J.; Chen, J. Bioaccumulation and human health implications of essential and toxic metals in freshwater products of Northeast China. *Sci. Total Environ.* 2019, 673: 768-776. <https://doi.org/10.1016/j.scitotenv.2019.04.099>.
10. Mohammed, A. M. F.; Saleh, I. A.; Abdel-Latif, N. M. Evaluation of Health Risks in Cairo Due to Deposited Dust Contaminated With Heavy Metals. *J. Hazard. Toxic Radioact. Waste.* 2020, 24(3): 04020007. [https://doi.org/10.1061/\(ASCE\)HZ.2153-5515.0000497](https://doi.org/10.1061/(ASCE)HZ.2153-5515.0000497).
11. Bat, L.; Öztekin, A.; Arici, E.; Şahin, F. Health risk assessment: heavy metals in fish from the southern Black Sea. *Foods and Raw Materials.* 2020, 8(1): 15–124. <https://doi.org/10.21603/2308-4057-2020-1-115-124>.
12. Han, J. L.; Pan, X. D.; Chen, Q.; Huang, B. F. Health risk assessment of heavy metals in marine fish to the population in Zhejiang, China. *Scientific Reports.* 2021, 11 (1): 11079. <https://doi.org/10.1038/s41598-021-90665-x>.
13. Saha, N.; Mollah, M.; Alam, M.; Rahman, M. S. Seasonal investigation of heavy metals in marine fishes captured from the bay of Bengal and the implications for human health risk assessment. *Food Control.* 2016, 70: 110–118. <https://doi.org/10.1016/j.foodcont.2016.05.040>.
14. Jiang, Z.; Xu, N.; Liu, B.; Zhou, L.; Wang, J.; Wang, C.; Dai, B.; Xiong, W. Metal concentrations and risk assessment in water, sediment and economic fish species with various habitat preferences and trophic guilds from Lake Caizi, Southeast China. *Ecotoxicol. Environ. Saf.* 2018, 157: 1-8. <https://doi.org/10.1016/j.ecoenv.2018.03.078>.
15. Huang, X.; Qin, D.; Gao, L.; Hao, Q.; Chen, Z.; Wang, P.; Tang, S.; Wu, S.; Jiangb, H.; Qiu, W. Distribution, contents and health risk assessment of heavy metal(loid)s in fish from different water bodies in Northeast China. *RSC Adv.* 2019, 9(57): 33130–33139. <https://doi.org/10.1039/c9ra05227e>.
16. Yap, C. K.; Cheng, W. H.; Ali, M. H.; Nulit, R.; Peng, S. H. T.; Ismail, M. S.; Leow, C. S.; Yap, C. W.. Heath Risk Assessment of Heavy Metals in Shrimp Acetes Sp. and Cincalok Collected in 2007 from Pantai Klebang, Peninsular Malaysia. *J Toxicol Risk Assess.* 2019, 5: 028. <https://doi.org/10.23937/2572-4061.1510028>.

17. Esilab, F.; Moturi, W. N.; Mokuu, M.; Mwanyika, T. Human Health Risk Assessment of Trace Metals in the Commonly Consumed Fish Species in Nakuru Town, Kenya. *Environmental Health Insights*. 2020, 14: 1–8. <https://doi.org/10.1177/1178630220917128>.
18. Miao, X.; Hao, Y.; Tang, X.; Xie, Z.; Liu, L.; Luo, S.; Huang, Q.; Zou, S.; Zhang, C.; Li, J. Analysis and health risk assessment of toxic and essential elements of the wild fish caught by anglers in Liuzhou as a large industrial city of China. *Chemosphere*. 2020, 243: 125337. <https://doi.org/10.1016/j.chemosphere.2019.125337>.
19. Miri, M.; Akbari, E.; Amrane, A.; Jafari, S. J.; Eslami, H.; Hoseinzadeh, E.; Zarrabi, M.; Salimi, J.; Sayyad, A. M.; Taghavi, M. Health risk assessment of heavy metal intake due to fish consumption in the Sistan region, Iran. *Environ Monit Assess*. 2017, 189: 583. <https://doi.org/10.1007/s10661-017-6286-7>.
20. Bassey, O. B.; Chukwu, L. O. Health Risk Assessment of Heavy Metals in Fish (*Chrysichthys nigrodigitatus*) from Two Lagoons in Southwestern Nigeria. *J Toxicol Risk Assess*. 2019, 5: 027. <https://doi.org/10.23937/2572-4061.1510027>.
21. Labib, M. W.; Safar, Z.; Khalil, M. H. Lead Emission Inventory in the Greater Cairo Area during the Life Time of CAIP. Air and Waste Management Conference, Air and Waste Management Association (A&WMA), USA. 2003, Paper # 70137. (6) (PDF) Lead Emissions Inventory in the Greater Cairo area During the Life Time of CAIP (researchgate.net).
22. Lowenthal, D. H.; Gertler, A.W.; Labib, M. W. Particulate matter source apportionment in Cairo: recent measurements and comparison with previous studies. *Int. J. Environ. Sci. Technol*. 2014, 11:657–670. <https://doi.org/10.1007/s13762-013-0272-6>.
23. Mohamed, H. E.; Monged, I. N. G.; Aquilanti, G.; Pollastri, S.; Rashadd, A. M.; Osa'nf, J. Heavy metals concentrations and speciation of Pb and Ni in airborne particulate matter over two residential sites in Greater Cairo – reflection from synchrotron radiation. *J. Synchrotron Rad*. 2022, 29: 765–774 <https://doi.org/10.1107/S1600577522003058>.
24. Hassanien, M. A.; Abdellatif, N. M.; Saleh, E. A.; Mohamed, A. M. Exposure and Risk Assessment of Chemical Pollution –Contemporary Methodology, edited by L. I. Simeonov & M. A. Hassanien. NATO Science for Peace and Security Series C: Environmental Security (NAPSC). Dordrecht: Springer. 2009, 303–315. Exposure and Risk Assessment of Chemical Pollution - Contemporary Methodology | SpringerLink.
25. Chen, L.; Bai, Z.; Kong, S.; Han, B.; You, Y.; Ding, X.; Dud, S.; Liue, A. (2010). A land use regression for predicting NO<sub>2</sub> and PM<sub>10</sub>. *Journal of Environmental Sciences*. 2010, 22(9): 1364-1373. [https://doi.org/10.1016/S1001-0742\(09\)60263-1](https://doi.org/10.1016/S1001-0742(09)60263-1).
26. Oucher, N.; Kerbach, R.; Ghezloun, A.; Merabet, H. Magnitude of Air Pollution by Heavy Metals Associated with Aerosols Particles in Algiers. *Energy Proc*. 2015, 74: 51–58. <https://doi.org/10.1016/j.egypro.2015.07.520>.
27. Benibo, A. G.; Sha'Atol, R.; Wuana, R. A.; Itodo, A. U. Assessment of Ambient Air Quality around Ihetutu Minefield, Ishiagu, Nigeria. *J. Chem. Soc. Nigeria*. 2020, 45(6): 1203 – 1214. <https://doi.org/10.46602/jcsn.v45i6.554>.
28. Ayua, T. J.; Tyovenda, A. A.; Sombo, T.; Tikyaa, E. V.; Igbawua, T. Fine Particulate Matter and Heavy Metals Pollution Status in Ambient Air of Some Selected Industrial Sites in Northern Nigeria. *Journal of Geoscience and Environment Protection*. 2020, 8: 1-13. <https://doi.org/10.4236/gep.2020.88001>.
29. Morakinyo, O. M.; Mukhola, M. S.; Mokgobu, M. I. Health Risk Analysis of Elemental Components of an Industrially Emitted Respirable Particulate Matter in an Urban Area. *Int. J. Environ. Res. Public Health*. 2021, 18: 3653. <https://doi.org/10.3390/ijerph18073653>.
30. Gharaibeh, A. A.; El-Rjoob, A. O.; Harb, M. K. Determination of selected heavy metals in air samples from the northern part of Jordan. *Environ. Monit. Assess*. 2010, 160(1-4): 425–429. <https://doi.org/10.1007/s10661-008-0706-7>.

31. Leili, M.; Naddafi, K.; Nabizadeh, R.; Yunesian, M.; Mesdaghinia A. The study of TSP and PM<sub>10</sub> concentration and their heavy metal content in central area of Tehran, Iran. *Air Qual Atmos Health*. 2008, 1:159–166. <https://doi.org/10.1007/s11869-008-0021-z>
32. Talebi, S. M.; Tavakoli, G. T. Level of PM<sub>10</sub> and its chemical composition in the Atmosphere of the city of Isfahan. Iran. *J Chem Eng* 2008; 5(3): 62-67. 102420080306.pdf.
33. Heidari-Farsani, M.; Shirmardi, M.; Goudarzi, G.; Alavi-Bakhtiarivand, N.; Ahmadi-Ankali, K.; Zallaghi, E.; Naeimabadi, A.; Hashemzadeh, B. The evaluation of heavy metals concentration related to PM<sub>10</sub> in ambient air of Ahvaz city, Iran. *J Adv Environ Health Res*. 2013, 1(2): 120-128. The evaluation of heavy metals concentration related to PM<sub>10</sub> in ambient air of Ahvaz city, Iran (muk.ac.ir).
34. Alidadi, R.; Mansouri, N.; Hemmasi, A. H.; Mirzahosseini, S. A. Risk Assessment of Heavy Metal in Ambient Air (Case Study: Ahvaz, Iran). *Anthropogenic Pollution Journal*. 2020, 4 (2): 1-7. <https://doi.org/10.22034/ap.2020.1906395.1074>.
35. Zhao, W. T.; Chen, J.; Hu, W. P.; Ting, H.; Li, G.; Shenggao, C.; Xiaowen, G. Distribution characteristics of heavy metals in PM<sub>2.5</sub>, PM<sub>10</sub> and TSP around electroplating factories and the health risk assessment. *Asian Journal of Ecotoxicology*. 2017, 12(3): 470-484. <https://doi.org/10.7524/AJE.1673-5897.20161211001>.
36. Duan, J.; Tan, J. Atmospheric heavy metals and Arsenic in China: Situation, sources and control policies. *Atmospheric Environment*. 2013, 74: 93-101. <https://doi.org/10.1016/j.atmosenv.2013.03.031>.
37. Luo, Q.; Xian, X.; Chen, G.; Yang, Q. Special and seasonal variations of trace metals in PM<sub>10</sub> in Chongqing. *Chinese Journal of Geochemistry*. 2005; 24(3): 262-264. <https://doi.org/10.1007/BF02871320>.
38. Wang, X.; Bi, X.; Sheng, G.; Fu J. Chemical composition and sources of PM<sub>10</sub> and PM<sub>2.5</sub> aerosols in Guangzhou, China. *Environ Monit Assess*. 2006; 119(1-3): 425-39. <https://doi.org/10.1007/s10661-005-9034-3>.
39. Hien, P. D.; Binh, N. T.; Truong, Y.; Ngo, N. T.; Sieu, L. N. Comparative receptor modelling study of TSP, PM<sub>2</sub> and PM<sub>2-10</sub> in Ho Chi Minh City. *Atmospheric Environment*. 2001; 35(15): 2669-2678. [https://doi.org/10.1016/S1352-2310\(00\)00574-4](https://doi.org/10.1016/S1352-2310(00)00574-4).
40. Fang, G. C.; Chang, C. N.; Chu, C. C.; Wu, Y. S.; Fu, P. P. C.; Yang, I. L.; Chen, M. H. Characterization of particulate, metallic elements of TSP, PM<sub>2.5</sub> and PM<sub>2.5-10</sub> aerosols at a farm sampling site in Taiwan, Taichung. *Science of the Total Environment*. 2003; 308(1-3): 157-66. [https://doi.org/10.1016/S0048-9697\(02\)00648-4](https://doi.org/10.1016/S0048-9697(02)00648-4).
41. Hsu, C. Y.; Chiang, H. C.; Lin, S. L.; Chen, M. J.; Lin, T. Y.; Chen, Y. C. Elemental characterization and source apportionment of PM<sub>10</sub> and PM<sub>2.5</sub> in the western coastal area of central Taiwan. *Sci. Total Environ*. 2016, 541: 1139–1150. <https://doi.org/10.1016/j.scitotenv.2015.09.122>.
42. Srithawirat, T.; Latif, M. T.; Sulaiman, F. R. Indoor PM<sub>10</sub> and its heavy metal composition at a roadside residential environment, Phitsanulok, Thailand. *Atmósfera*. 2016, 29(4): 311-322. <https://doi.org/10.20937/ATM.2016.29.04.03>.
43. Khan, S. A.; Muhammad, S.; Nazir, S.; Shah, F. A. Heavy metals bounded to particulate matter in the residential and industrial sites of Islamabad, Pakistan: Implications for non-cancer and cancer risks. *Environ. Technol. Innov*. 2020, 19: 100822. <https://doi.org/10.1016/j.eti.2020.100822>.
44. Manalis, M.; Grivas, G.; Protonatarios, V.; Moutsatsou, A.; Samara, C.; Chaloulakou, A. Toxic metal content of particulate matter (PM<sub>10</sub>) within the Greater Area of Athens. *Chemosphere*. 2005, 60(4): 557–566. <https://doi.org/10.1016/j.chemosphere.2005.01.003>.
45. Contini, D.; Cesari, D.; Donato, A.; Chirizzi, D.; Belosi, F. Characterization of PM<sub>10</sub> and PM<sub>2.5</sub> and their metals content in different typologies of sites in South-Eastern Italy. *Atmosphere*. 2014, 5(2): 435-453. <https://doi.org/10.3390/atmos5020435>.
46. Di Vaio, P.; Magli, E.; Caliendo, G.; Corvino, A.; Fiorino, F.; Frecentese, F.; Saccone, I.; Santagada, V.; Severino, B.; Onorati, G.; Freda, G. O.; Manzo, C.; Perissutti, E. Heavy Metals Size Distribution

- in PM<sub>10</sub> and Environmental-Sanitary Risk Analysis in Acerra (Italy). *Atmosphere*. 2018, 9: 58. <https://doi.org/10.3390/atmos9020058>.
47. Kunt, F.; Ayturan, Z. C.; Yümün, F.; Karagönen, I.; Semerci, M.; Akgün, M. Modeling and Assessment of PM<sub>10</sub> and Atmospheric Metal Pollution in Kayseri Province, Turkey. *Atmosphere*. 2023, 14: 356. <https://doi.org/10.3390/atmos14020356>.
  48. Avino, P.; Capannesi, G.; Rosada, A. Heavy metal determination in atmospheric particulate matter by Instrumental Neutron Activation Analysis. *Microchem. J.* 2008, 88(2): 97–106. <https://doi.org/10.1016/j.microc.2007.11.005>.
  49. Zegarra, R.; Andrade, S.; Parra, M.; Mejía, D.; Roda, C. Análisis espacial de PM<sub>10</sub> en el aire y su composición de metales con relación a factores ambientales alrededor de centros de educación preescolar en Cuenca. *Maskana*. 2020, 11(1): 57-68. <https://doi.org/10.18537/mskn.11.01.06>.
  50. Bretón, J. G. C.; Bretón, R. M. C.; Guzman, A. A. E.; Guarnaccia, C.; Morales, S. M.; Severino, R. C. L.; Marrón, M. R.; López, G. H.; Lozada, S. E. C.; Kahl, J. D. W.; Pech, I. E. P.; Lara, E. R.; Fuentes, M. L. E. Trace Metal Content and Health Risk Assessment of PM<sub>10</sub> in an Urban Environment of León, Mexico. *Atmosphere*. 2019, 10: 573. <https://doi.org/10.3390/atmos10100573>.
  51. Ceron J.; Ceron R.; Lara R.; Martínez S. Chapter 6: Evaluation of the heavy metal's levels in PM<sub>10</sub> particles in air of an urban site of Leon City, in the cold dry climatic season 2018. Marroquín A, Olivares J, Ventura D, Cruz L. (Coord.) CIERMMI Women in Science TXVI Engineering and Technology. Handbooks-©ECORFAN-México, Querétaro. 2021. <https://doi.org/10.35429/H.2021.16.85.106>.
  52. Rodriguez, P.; Flores, R.; Mugica, V.; Morales, S. Sources of trace metals in PM<sub>10</sub> from a petrochemical industrial complex in Northern Mexico. *Air Qual. Atmos. Health*. 2017, 10: 69–84. <https://doi.org/10.1007/s11869-016-0409-0>.
  53. Flores-Rangel, R. M.; Rodríguez-Espinosa, P. F.; Montes de Oca-Valero, J. A.; Mugica-Álvarez, V.; Ortiz-Romero-Vargas, M. E.; Navarrete-López, M.; Dorantes-Rosales, H. J.; Morales-García, S. S. Temporal variation of PM<sub>10</sub> and metal concentrations in Tampico, Mexico. *Air Quality, Atmosphere & Health*. 2015, 8(4): 367-378. <https://doi.org/10.1007/s11869-014-0291-6>.
  54. Cruz, M.; Alberto, A.; Cárdenas, B.; Blanco, S.; Molina, L.; Querol, X. Mass concentration, composition and sources of fine and coarse particulate matter in Tijuana, Mexico, during Cal-Mex campaign. *Atmos. Environ.* 2014, 88: 320–329. <https://doi.org/10.1016/j.atmosenv.2013.09.032>.
  55. Morales-García, S.; Rodríguez, P.; Jonathan, M.; Navarrete, M.; Herrera, M.; Muñoz, N. Characterization of As and trace metals embedded in PM<sub>10</sub> particles in Puebla City, México. *Environ. Monit. Assess.* 2014, 186(1): 55–67. doi: 10.1007/s10661-013-3355-4.
  56. Campos, A.; Aragon, A.; Alastuey, A.; Galindo, I.; Querol, X. Levels, composition and source apportionment of rural background PM<sub>10</sub> in western Mexico (state of Colima). *Atmos. Pollut. Res.* 2011, 2(4): 409–417. <https://doi.org/10.5094/APR.2011.046>.
  57. Martínez, T. S. M. Estudio de PM<sub>10</sub> y metales (Cu, Fe, Mn, Pb) en aire ambiente, en la región de Cananea, Sonora, México. Sonora, México: universidad de Sonora. Thesis. Universidad de Sonora. División de Ingeniería. Departamento de Ingeniería Química y Metalurgia. 2019. <http://creativecommons.org/licenses/by-nc-nd/4.0>.
  58. Morton-Bermea, O.; Hernández, E.; Almorín, M. A.; Ordoñez, S.; Bermendi, L.; Retama, A. Historical trends of metals concentration in PM<sub>10</sub> collected in the Mexico City metropolitan area between 2004 and 2014. *Environmental Geochemistry and Health*. 2021, 43: 2781–2798. <https://doi.org/10.1007/s10653-021-00838-w>.
  59. Cruz, L.; Valdivia, J. A. Cuantificación de la concentración de Zn, Cu, Pb y Cd en partículas menores de 10µm procedentes del aerosol atmosférico. Clasificación de las fuentes contaminantes en la zona de estudio. *Killkana Técnica*. 2017, 1(3): 17-24. [https://doi.org/10.26871/killkana\\_tecnica.v1i3.82](https://doi.org/10.26871/killkana_tecnica.v1i3.82).
  60. Zalakeviciute, R.; Rybarczyk, Y.; Granda-Albuja, M. G.; Suarez, M. V. D.; Alexandrino, K. Chemical characterization of urban PM<sub>10</sub> in the Tropical Andes. *Atmospheric Pollution Research*. 2020, 11(2): 343-356. <https://doi.org/10.1016/j.apr.2019.11.007>.

61. Loyola, J.; Arbilla, G.; Quiterio, S.; Escaleira, V.; Minhod, S. Trace Metals in the Urban Aerosols of Rio de Janeiro City. *J. Braz. Chem. Soc.* 2012, 23: 628–638. <https://doi.org/10.1590/S0103-50532012000400007>.
62. Rojano, R.; Arregoces, H.; Restrepo, G. Composición Elemental y Fuentes de Origen de Partículas Respirables (PM<sub>10</sub>) y Partículas Suspensas Totales (PST) en el Área Urbana de la Ciudad de Riohacha, Colombia. *Inf. Tecnol.* 2014, 25(6): 3–12. <http://dx.doi.org/10.4067/S0718-07642014000600002>.
63. NSW/EPA (New South Wales/Environment Protection Authority). Ambient Air Quality Research Project (1996–2001). Ambient concentrations of heavy metals in NSW. Internal working paper no. 4. Atmospheric Science Section of the Department of Environment and Conservation (NSW), Sydney. New South Wales Environment Protection Authority, Sydney, NSW, Australia. EPA 2003/75 ISBN 1 7413 7003 5 December 2003. Ambient air quality research (1996-2001) Dioxins ([nsw.gov.au](http://nsw.gov.au)).
64. EEAA (Egyptian Environmental Affairs Agency). National Network for Monitoring Ambient Air Pollutants Report 2015. Ministry of State for Environmental Affairs. Published 2015.
65. Agarwal, A.; Mangal, A.; Satsangi, A.; Lakhani, A.; Kumari, K. M. Characterization, sources and health risk analysis of PM<sub>2.5</sub> bound metals during foggy and non-foggy days in sub-urban atmosphere of Agra. *Atmos. Res.* 2017, 197: 121–131. <https://doi.org/10.1016/j.atmosres.2017.06.027>.
66. FMEnv (Federal Ministry of Environment). National interim guidelines and standards for environmental pollution control in Nigeria, Federal Environmental Protection Agency (FEPA) DPR (Department of Petroleum Resources), Environmental Guidelines and standards for the petroleum industry in Nigeria (EGASPIN), Issued by The Department of Petroleum Resources, Lagos, 1991, Revised 2002, Pp 279. Interim Guidelines and Standards for Environmental Pollution Control in Nigeria. | InforMEA.
67. NESREA (National Environmental Standards and Regulations Enforcement Agency). National Environmental (Air Quality Control) Regulations. Federal Republic of Nigeria Official Gazette, B827-850, 101 (142), Government Notice No. 225. 2014. [air\\_quality\\_control.pdf](http://air_quality_control.pdf) ([nesrea.gov.ng](http://nesrea.gov.ng)).
68. Asamoah, B. D.; Asare, A.; Okpati, S. W.; Aidoo, P. Heavy metal levels and their ecological risks in surface soils at Sunyani magazine in the bono region of Ghana. *Scientific African.* 2021, 13: e00937. <https://doi.org/10.1016/j.sciaf.2021.e00937>.
69. Chen, J.; Wei, F.; Zheng, C.; Wu, Y.; Adrian, D. C. Background concentrations of elements in soils of China. *Water Air Soil Pollution.* 1991, 57: 699–712. <https://doi.org/10.1007/BF00282934>.
70. Liu, H.; Zhang, Y.; Zhou, X.; You, X.; Shi, Y.; Xu, J. Source identification and spatial distribution of heavy metals in tobacco-growing soils in Shandong province of China with multivariate and geostatistical analysis. *Environmental Science and Pollution Research.* 2017, 24: 5964–5975. <https://doi.org/10.1007/s11356-016-8229-1>.
71. Parvez, S.; Nawshin, S.; Sultana, S.; Hossain, S.; Khan, H. R.; Habib, A.; Nijhum, Z. T.; Khan, R. Evaluation of Heavy Metal Contamination in Soil Samples around Rampal, Bangladesh. *ACS Omega.* 2023, 8: 15990–15999. <https://doi.org/10.1021/acsomega.2c07681>.
72. Amouei, A.; Cherati, A.; Naghipour, D. Heavy Metals Contamination and Risk Assessment of Surface Soils of Babol in Northern Iran. *Health Scope.* 2017, 7(1): e62423. <https://doi.org/10.5812/jhealthscope.62423>.
73. Salonen, V. P.; Korkka-Niemi, K. Influence of parent sediments on the concentration of heavy metals in urban and suburban soils in Turku, Finland. *Applied Geochemistry.* 2007, 22(5): 906–918. <https://doi.org/10.1016/j.apgeochem.2007.02.003>.
74. Dos Santos, A. S. N.; Alleoni, L. R. F. Reference values for heavy metals in soils of the Brazilian agricultural frontier in Southwestern. *Environ Monit Assess.* 2013, 185: 5737–5748. <https://doi.org/10.1007/s10661-012-2980-7>.
75. Chiroma, T. M.; Ebewe, R. O.; Hymore, F. K. Comparative assessment of heavy metal levels in soil, vegetables and urban grey waste water used for irrigation in Yola And Kano. *Inter. Ref. J. Eng. Sci.* 2014, 3 (2): 1–9. [A03020109.pdf](http://A03020109.pdf) ([irjes.com](http://irjes.com)).

76. NJDEP (New Jersey Department of Environmental Protection). Appendix A: Soil Cleanup Criteria. New Jersey Department of Environmental Protection, Proposed Cleanup Standards for Contaminated Sites, NJAC 7:26D, 1996. [sgdappa-e.pdf \(nj.gov\)](#).
77. Wuana, R. A.; Okieimen, F. E. Heavy Metals in Contaminated Soils: A Review of Sources, Chemistry, Risks and Best Available Strategies for Remediation. International Scholarly Research Network, ISRN Ecology. 2011, 402647: 20. <https://doi.org/10.5402/2011/402647>.
78. Hindarwati, Y.; Soeprbowati, T. R.; Sudarno, . Heavy Metal Content in Terraced Rice Fields at Sruwen Tenggara Semarang – Indonesia. The 2<sup>nd</sup> International Conference on Energy, Environmental and Information System (ICENIS 2017). E3S Web of Conferences. 2018, 31(03009): 1-6. DOI: <https://doi.org/10.1051/e3sconf/20183103009>.
79. Hemens, J.; Connell, A. D. Richards Bay: Southern bay conservation area. CSIR/NIWR Progress Report No. 29 CSIR, Durban, South Africa. 1975.
80. Guo, H.; Yang, L.; Han, X.; Dai, J.; Pang, X.; Ren, M.; Zhang, W. Distribution characteristics of heavy metals in surface soils from the western area of Nansi Lake, China. Environ Monit Assess. 2019, 191: 262. <https://doi.org/10.1007/s10661-019-7390-7>.
81. Abdelhamid, A. M.; Asmaa, A.; El-Kerdawy, A. A. M.; El-Mezaien, A.; Meshref, H. A. Study on pollution in the Western-North region of El-Manzalah Lake, Egypt. J. Agric. Sci. Mansoura Univ. 1997, 22(6): 1877-1885. STUDIES ON SOME HEAVY METALS IN THE RIVER NILE WATER AND FISH AT HELWAN AREA, EGYPT ([ekb.eg](#)).
82. Bahnasawy, M.; Khidr, A.; Dheina, N. Seasonal Variations of Heavy Metals Concentrations in Mullet, Mugil Cephalus and Liza Ramada (Mugilidae) from Lake Manzala, Egypt. Journal of Applied Sciences Research. 2009, 5(7): 845-852. <https://doi.org/10.21608/EJABF.2009.2034>.
83. Abd El-kader, A. I.; Bahnasawy, M.; Zaky, M.; El-Serafy, M. A. Assessment of heavy metal concentration in water and the Nile tilapia of Lake Manzala, EL-Kapoty, Egypt. Egyptian Journal of Aquatic Biology and Fisheries. 2022, 26(5): 137 – 147. <https://doi.org/10.21608/EJABF.2022.258909>.
84. El-Moselhy, K. H. M.; Othman, A. I.; Abd El-Azem, B. H.; El-Metwally, M. E. A. Bioaccumulation of Heavy Metals in Some Tissues of Fish in the Red Sea, Egypt. Egyptian Journal of Basic and Applied Sciences. 2014, 1(2): 97-105. <http://doi.org/10.1016/j.ejbas.2014.06.001>.
85. Abdelmoneim, M., Khaled, A. and Iskander, M. A Study on the Levels of Some Heavy Metals in EL-Mex, West of Alexandria, Egypt. Proceedings of the 4<sup>th</sup> Conference of the Environment Protection, 10-12 May 1994, 155-174.
86. Al-Najjar, T.; Al-Momani, R.; Khalaf, M.; Wahsha, M.; Sbaihat, M.; Khalaf, N.; Khadra, K. A.; Magames, H. Levels of Heavy Metals in Fishes (*Cheilinus trilobatus*) from the Gulf of Aqaba, Jordan. Natural Science. 2016, 8: 256-263. <http://dx.doi.org/10.4236/ns.2016.86030>.
87. Ali, A. A.; Elazein, E. M.; Alian, M. A. Investigation of Heavy Metals Pollution in Water, Sediment and Fish at Red Sea-Jeddah Coast-KSA at Two Different Locations. Journal of Applied Environmental Biological Sciences. 2011, 1(12): 630-637. Microsoft Word - JAEBS-160-FORM.pdf. ([textroad.com](#)).
88. Al-Adrise, M. A. M. Concentration of Some Heavy Metals in Khor-Kutheb Area (Al-Hodiedah) as a Result of the Sewage Effluent Impacts. M.Sc Thesis, Faculty of Science, Sana'a University, Sana'a. 2002.
89. Canli, M.; Atli, G. The relationships between heavy metal (Cd, Cr, Fe, Pb, Zn) levels and the size of six Mediterranean fish species. Environ. Pollut. 2003, 121(1): 129-136. [https://doi.org/10.1016/S0269-7491\(02\)00194-X](https://doi.org/10.1016/S0269-7491(02)00194-X).
90. Hussein, A.; Khalid, A. Determination of Metals in Tuna Species and Bivalves from Alexandria, Egypt. Egyptian Journal of Aquatic Research. 2014, 40: 9-17. <http://dx.doi.org/10.1016/j.ejar.2014.02.003>
91. Gorur, F. K.; Keser, R.; Akcay, N.; Dizman, S. Radioactivity and Heavy Metal Concentrations of Some Commercial Fish Species Consumed in the Black Sea Region of Turkey. Chemosphere. 2012, 87: 356-361. <http://dx.doi.org/10.1016/j.chemosphere.2011.12.022>.



92. Hossain, M. B.; Tanjin, F.; Rahman, M. S.; Yu, J.; Akhter, S.; Noman, M. A.; Sun, J. Metals Bioaccumulation in 15 Commonly Consumed Fishes from the Lower Meghna River and Adjacent Areas of Bangladesh and Associated Human. Health Hazards. Toxics. 2022, 10 (13): 139. <https://doi.org/10.3390/toxics10030139>.
93. Rahman, M. S.; Molla, A. H.; Saha, N.; Rahman, A. Study on heavy metals levels and its risk assessment in some edible fishes from Bangshi River, Savar, Dhaka, Bangladesh. Food Chem. 2012, 134(4): 1847–1854. <https://doi.org/10.1016/j.foodchem.2012.03.099>.
94. MOFL (Ministry of Fisheries and Livestock). Bangladesh Gazette; SRO No. 233/Ayen; Bangladesh Ministry of Fisheries and Livestock: Dhaka, Bangladesh, 2014.
95. Ahmed, A. S.; Rahman, M.; Sultana, S.; Babu, S. O. F.; Sarker, M. S. I. Bioaccumulation and heavy metal concentration in tissues of some commercial fishes from the Meghna River Estuary in Bangladesh and human health implications. Mar. Pollut. Bull. 2019, 145: 436–447. <https://doi.org/10.1016/j.marpolbul.2019.06.035>.
96. FSS (Food Safety and Standards). Contaminants, Toxins and Residues. Regulations. 2011. [Compendium\\_Contaminants\\_Regulations\\_20\\_08\\_2020.pdf](https://www.fssai.gov.in/Compendium/Contaminants_Regulations_20_08_2020.pdf) (fssai.gov.in).
97. MFA (Malaysian Food Act). Malaysian Food and Drug; MDC Publishers Printer Sdn. Bhd: Kuala Lumpur, Malaysia, 1983.
98. GB (Google-Books). Marine Biological Quality. National Marine Standards and Metrology Center: Tianjin, China. 2001, GB 18421-2001. GB 18421-2001 English PDF (GB18421-2001) (chinesestandard.net).
99. Alipour, H.; Banagar, G. R. Health risk assessment of selected heavy metals in some edible fishes from Gorgan Bay, Iran. Iran. J. Fish. Sci. 2018, 17(1): 21–34. <https://doi.org/10.22092/IJFS.2018.115582>.
100. Kwaansa-Ansah, E. E.; Nti, S. O.; Opoku, F. Heavy metals concentration and human health risk assessment in seven commercial fish species from Asafo Market, Ghana. Food Sci. Biotechnol. 2018, 28(2): 569–579. <https://doi.org/10.1007/s10068-018-0485-z>.
101. Xie, W.; Chen, K.; Zhu, X.; Nie, X.; Zheng, G.; Pan, D.; Wang, S. Evaluation of heavy metal contents in water and fishes collected from the waterway in Pearl River Delta in south China. J. Agro-Environ. Sci. 2010, 29: 1917–1923. <https://api.semanticscholar.org/CorpusID:130015899>.
102. EOS (Egyptian Organization for Standardization). Maximum Levels for certain contaminants in foodstuffs. 2018, 2018-Commission Regulation (EC) No 1881/2006. 7136 / 2010 (eos.org.eg).
103. Helmy, N. A.; Hassan, M. A.; Hassanien, F. S.; Maarouf, A. A. Detection of Heavy Metals Residues in Fish and Shellfish. Benha Veterinary Medical Journal. 2018, 34(2): 255-264. [article\\_29436\\_1608aa6076fd95d3c5234b06c4b14197.pdf](https://www.bvmedj.com/article_29436_1608aa6076fd95d3c5234b06c4b14197.pdf) (ekb.eg).
104. EC (European Community). Setting Maximum Levels for Certain Contaminants in Foodstuffs. 2006, Commission Regulation (EC) No 1881/2006. LexUriServ.do (europa.eu).
105. FAO (The Food and Agriculture Organization). Compilation of Legal Limits for Hazardous Substances in Fish and Fishery Products. 1983. FAO Fishery Circular No. 464, 01/01/1983: 5-100. <http://www.fao.org/docrep/014/q5114e/q5114e.pdf>.
106. Mokhtar, M. B.; Aris, A. Z.; Munusamy, V.; Praveena, S. M. Assessment Level of Heavy Metals in *Penaeus monodon* and *Oreochromis* spp. in Selected Aquaculture Ponds of High Densities Development Area. European Journal of Scientific Research. 2009, 30(3): 348-360. <http://www.eurojournals.com/ejsr.htm>.
107. FAO/WHO (The Food and Agriculture Organization/ World Health Organization). Evaluation of Certain Food Additives and Contaminants: Sixty-Ninth Report of the Joint FAO/WHO Expert Committee on Food Additives. World Health Organization: Expert Committee on Food Additives. Geneva, Switzerland, 2009: WHO technical report series; 952. WHO\_TRS\_940\_eng.pdf.
108. NOAA (National Oceanic and Atmospheric Administration). Screening quick reference tables (SQuiRT) in sediment. 2009. <http://response.restoration.noaa.gov/bookshelf/122New-SQuiRTS.Pdf>.

109. FDA (Food and Drug Administration). Fish and Fishery Products Hazards and Controls Guidance. US Department of Health and Human Services, Food and Drug Administration: Silver Spring, MD, USA, 2011, Fourth Edition. Fish and Fishery Products Hazards and Controls Guidance (oregonstate.edu).
110. ROPME (Regional Organization for the Protection of the Marine Environment). Regional Report of the State of the Marine Environment: Kuwait City, Kuwait. 1999: 220. [rsrs112.pdf](#) (unep.org).
111. MAFF (Ministry of Agriculture, Fisheries and Food). Monitoring and Surveillance of Non-Radioactive Contaminants in the Aquatic Environment and Activities Regulating the Disposal of Wastes at Sea, 1995 and 1996. Center for Environment, Fisheries and Aquaculture Science (CEFAS). Aquatic Environment Monitoring. Lowestoft, 1998, Report No. 52. 51Sect1\_3.p65 (cefas.co.uk).
112. AbuShady, M. M.; Fathy, H. A.; Fathy, G. A.; Abd-el Fatah, S.; Ali, A.; Abbas, M. A. Blood lead levels in a group of children: the potential risk factors and health problems. *J Pediatr (Rio J)*. 2017, 93(6): 619-624. <https://doi.org/10.1016/j.jpeds.2016.12.006>.
113. Abou-Arab, A. A. K.; Abou Donia, M. A. A.; Sharaf, N. E.; Mohamed, S. R. Lead Levels in Human Blood as Biological Test in Different Egyptian Environments. *World Journal of Medical Sciences*. 2014, 10(4): 392-399. <https://doi.org/10.5829/idosi.wjms.2014.10.4.1144>.
114. Nasralla, M. M.; Shakour, A. A.; Said, E. A. Effect of lead exposure on traffic policemen, *Egyptian J. industrial Medicine*. 1984, 8: 87-104.
115. Shakour, A. A.; El Taieb, N. M. Effect of atmospheric lead exposure on urban children. *Egyptian J. of Occupational Med*. 1994, 18(1): 37-47.
116. Chappell, R.; Billig, P.; Brantly, E.; Ault, S.; Ezzeldin, H. S. Lead exposure abatement plan for Egypt. Environmental Health Project. Activity report No. 32. Prepared for the USAID Mission to Egypt under EHP Activity No. 256-CC. US Agency for International Development, Washington DC 20523. (1997).
117. Monir, Z. A.; Koura, A.; Mawogood, S.; Abdel Aziz, A.; El-Housseiny, S. Growth and development in school age children relation to blood level. *Egypt. Med. J. NRC*. 2003, 2(2): 93-112.
118. Sharaf, N. E.; Abdel-Shakour, A.; Amer, N. M.; Abou-Donia, M. A.; Khatab, N. Evaluation of Children's Blood Lead Level in Cairo, Egypt. *American-Eurasian J. Agric. & Environ. Sci*. 2008, 3 (3): 414 - 419. [18.xps](#) (idosi.org).
119. Boseila, S. A.; Gabr, A. A.; Hakim, I. A. Blood Lead Levels in Egyptian Children: Influence of Social and Environmental Factors. *American Journal of Public Health*. 2004, 94(1): 47-49. <https://doi.org/10.2105/ajph.94.1.47>.
120. Attia, W. M. K.; Abdel-Kareem, F. M.; Mohamed, A. A.; Hussein, A. H. Screening tools detection Pediatrics of children at risk for lead exposure. *Zagazig. Univ. Med. J*. 1996, 11(2): 144-153.
121. Ye, X; Fu, H; Guidotti, G. Environmental Exposure and Children's Health in China. *Archives of Environmental and Occupational Health*. 2007, 62(2): 61-73. <https://doi.org/10.3200/AEOH.62.2.61-73>.
122. Zhang, Z. W.; Moon, C. S.; Shimbo, S.; Watanabe, T.; Nakatsuka, H.; Matsuda-Inoguchi, N.; Higashikawa, K.; Ikeda, M. Further reduction in lead exposure in women in general populations in Japan in the 1990s, and comparison with levels in east and south-east Asia. *Int. Arch. Occup. Environ. Health*. 2000, 73(2): 91-97. <https://doi.org/10.1007/s004200050013>.
123. Watanabe, T.; Zhang, Z. W.; Qu, J. B.; Gao, W. P.; Jian, Z. K.; Shimbo, S.; Nakatsuka, H.; Matsuda-Inoguchi, N.; Higashikawa, K.; Ikeda, M. Background lead and cadmium exposure of adult women in Xian City and two farming villages in Shaanxi Province, China. *Sci. Total Environ*. 2000, 247(1): 1-13. [https://doi.org/10.1016/S0048-9697\(99\)00416-7](https://doi.org/10.1016/S0048-9697(99)00416-7).
124. Lars, G.; Lundh, T. Metal concentrations in blood and hair in pregnant females in southern Sweden. *Journal of Environmental Health*. 2010, 72(6): 37-41. Metal concentrations in blood and hair in pregnant females in southern Sweden - PubMed (nih.gov).
125. NIEHS (National Institute for Environmental Health Services). National Toxicology Program (NTP) Monograph: Health effects of low-level lead. 2012. Health Effects of Low-level Lead (nih.gov).

126. CDC (Centers for Disease Control and Prevention). Fourth national report on human exposure to environmental chemicals, updated tables, January 2019. National Center for Environmental Health (U.S.). Atlanta, GA: U.S. Department of Health and Human Services, Centers for Disease Control and Prevention. 2019. [https://stacks.cdc.gov/view/cdc/75822/cdc\\_75822\\_DS1.pdf](https://stacks.cdc.gov/view/cdc/75822/cdc_75822_DS1.pdf).
127. CDPH (California Department of Public Health). Health-based guidelines for blood lead levels in adults. 2019. Richmond, CA. Health-Based Guidelines for Blood Lead Levels in Adults (ca.gov).
128. NIOSH (National Institute for Occupational Safety and Health). Adult Blood Lead Epidemiology and Surveillance (ABLES). CDC (Centers for Disease Control and Prevention), National Institutes of Health. 2020. Lead: Adult Blood Lead Epidemiology and Surveillance (ABLES) | NIOSH | CDC.
129. The Adair County Health Department. 2022. Lead Contamination. Lead Contamination | Adair County Health Department (lphamo.org).
130. Lead Smart. Living with lead in Broken Hill. Lead Smart is a joint initiative between the NSW Environment Protection Authority (EPA), NSW (New South Wales, Australia) Health, the Broken Hill Environmental Lead Program, the Child and Family Health Centre and Maari Ma Health Aboriginal Corporation. 2022. <https://leadsmart.nsw.gov.au/effects-of-lead/>.
